# Supplementary material for: KI-catalyzed arylation of benzothiazoles from the coupling of aryl aldehydes with benzothiazoles in neat water
Source: Royal Society of Chemistry journal article supplement (doi:10.1039/c3ob42318b), 2014-01-01

## Supporting Information

### KI-catalyzed arylation of benzothiazoles from the coupling of aryl aldehydes with benzothiazoles in neat water

Yuyu Gao, Qiuling Song, Guolin Cheng, and Xiuling Cui\*

*Engineering Research Center of Molecular Medicine, Ministry of Education, The Key Laboratory of Xiamen Marine and Gene Drugs, Institutes of Molecular Medicine and School of Biomedical Sciences at Huaqiao University, 668 Jimei Blvd, Xiamen, Fujian, 361021, P. R. China*  
*E-mail: cuixl@hqu.edu.cn*

## Table of Contents

|                                                                         |            |
|-------------------------------------------------------------------------|------------|
| <b>1. General information.....</b>                                      | <b>S2</b>  |
| <b>2. General experimental procedure for arylation.....</b>             | <b>S2</b>  |
| <b>3. Characterization data of products.....</b>                        | <b>S2</b>  |
| <b>4. The <sup>13</sup>C benzaldehyde labeled experiments.....</b>      | <b>S12</b> |
| <b>5. References.....</b>                                               | <b>S14</b> |
| <b>6. <sup>1</sup>H and <sup>13</sup>C NMR spectra of products.....</b> | <b>S15</b> |

### General Information:

All experiments were conducted under N<sub>2</sub> atmosphere. Flash column chromatography was performed over silica gel 40-60 μm. All melting points were determined on a Beijing Science Instrument Dianguang Instrument Factory XT4B melting point apparatus and are uncorrected. <sup>1</sup>H-NMR spectra were recorded on Bruker AVIII-400 Hz spectrometers. Chemical shifts(in ppm): were referenced to tetramethylsilane(δ = 0 ppm) in CDCl<sub>3</sub> as an internal standard. <sup>13</sup>C-NMR spectra were obtained by using the same NMR spectrometers and were calibrated with CDCl<sub>3</sub>(δ = 77.00 ppm):. Unless otherwise noted, materials obtained from commercial suppliers were used without further purification.

### Catalytic general procedure: 2-phenylbenzothiazole(3aa):

An oven-dried reaction tube (5 mL) was charged with benzothiazole (**1a**, 68 mg, 0.5 mmol), benzaldehyde (2a, 80 mg, 0.75 mmol), 70% TBHP in water (207 μL, 1.5 mmol), KI (17 mg, 0.01 mmol) and water 1 mL. The resulting solution was stirring at 100 °C under N<sub>2</sub> for 8 h(monitored by TLC). Upon completion of the reaction, the mixture was extracted with ethyl acetate (10 mL × 3). The organic layers were combined, washed with saturated Na<sub>2</sub>S<sub>2</sub>O<sub>3</sub> aqueous solution, saturated NaHCO<sub>3</sub> aqueous solution, dried over anhydrous Na<sub>2</sub>SO<sub>4</sub>, and filtered. The solvents were removed via rotary evaporator and the residue was purified with flash chromatography (silica gel, petroleum ether/ethyl acetate = 100:1) to give **3aa** as white solid; yield: 76.1 mg (72%).

### 2-phenylbenzothiazole (3aa, CAS: 883-93-2)<sup>[1]</sup>

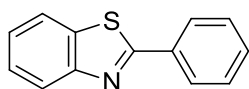

<sup>1</sup>H-NMR(400 MHz, CDCl<sub>3</sub>, ppm): δ 8.09 (m, 3H), 7.90 (d, *J* = 8.0 Hz, 1H), 7.51-7.47 (m, 4H), 7.38 (t, *J* = 7.6 Hz, 1H), 2.66 (s, 3H); <sup>13</sup>C-NMR (100 MHz, CDCl<sub>3</sub>, ppm): δ 168.0, 154.1, 135.1, 133.6, 131.0, 129.0, 127.5, 126.3, 125.2, 123.2, 121.6; mp: 110-112 °C (lit. 112-114 °C).

### 2-(2-Methylphenyl) benzothiazole (3ab, CAS: 15903-58-9)<sup>[2]</sup>

The product was isolated as white solid in 58% yield (65.1mg).

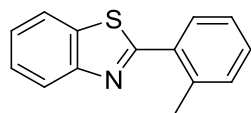

$^1\text{H-NMR}$  (400 MHz,  $\text{CDCl}_3$ , ppm):  $\delta$  8.06 (d,  $J = 8.1$  Hz, 1H), 7.94 (s, 1H), 7.42-7.24 (m, 2H), 7.50 (t,  $J = 7.6$  Hz, 1H), 7.33 (m, 4H);  $^{13}\text{C-NMR}$  (100 MHz,  $\text{CDCl}_3$ , ppm):  $\delta$  168.0, 153.8, 137.3, 135.6, 133.1, 131.5, 130.5, 130.0, 126.1, 126.1, 125.1, 123.4, 121.4, 21.3; mp: 52-54  $^\circ\text{C}$  (lit. 53-54  $^\circ\text{C}$ ).

### 2-(3-Methylphenyl) benzothiazole (3ac, CAS: 1211-32-1)<sup>[2]</sup>

The product was isolated as white solid in 54% yield (60.9 mg).

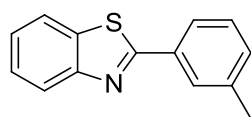

$^1\text{H-NMR}$  (400 MHz,  $\text{CDCl}_3$ , ppm):  $\delta$  8.10 (d,  $J = 8.1$  Hz, 1H), 7.92 (d,  $J = 8.0$  Hz, 1H), 7.88 (m, 2H), 7.48 (t,  $J = 7.0$  Hz, 1H), 7.37 (t,  $J = 7.9$  Hz, 2H), 7.30 (d,  $J = 8.0$  Hz, 1H), 2.45 (s, 3H);  $^{13}\text{C-NMR}$  (100 MHz,  $\text{CDCl}_3$ , ppm):  $\delta$  168.3, 154.1, 138.9, 135.0, 133.5, 131.8, 128.9, 128.0, 126.2, 125.1, 124.8, 123.2, 121.6, 21.3; mp: 67-68  $^\circ\text{C}$  (lit. 67-68  $^\circ\text{C}$ ).

### 2-(4-Methylphenyl) benzothiazole (3ad, CAS: 16112-21-3)<sup>[1]</sup>

The product was isolated as white solid in 62% yield (70 mg).

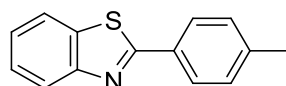

$^1\text{H-NMR}$  (400 MHz,  $\text{CDCl}_3$ , ppm):  $\delta$  8.05 (d,  $J = 8.1$  Hz, 1H), 7.97 (d,  $J = 8.0$  Hz, 1H), 7.87 (d,  $J = 8.0$  Hz, 1H), 7.47 (t,  $J = 7.9$  Hz, 1H), 7.35 (t,  $J = 7.6$  Hz, 1H), 7.28 (d,  $J = 8.0$  Hz, 2H), 2.41 (s, 3H);  $^{13}\text{C-NMR}$  (100 MHz,  $\text{CDCl}_3$ , ppm):  $\delta$  168.2, 154.2, 141.4, 135.0, 130.9, 129.7, 127.5, 126.2, 125.0, 123.0, 121.5, 21.5; mp: 85-86  $^\circ\text{C}$  (lit. 84-86  $^\circ\text{C}$ ).

### 2-(2, 4-Dimethylphenyl) benzothiazole (3ae, CAS: 902086-26-4)<sup>[9]</sup>

The product was isolated as white solid in 49% yield (59 mg).

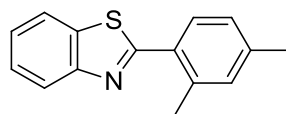

$^1\text{H-NMR}$  (400 MHz,  $\text{CDCl}_3$ , ppm):  $\delta$  8.08 (d,  $J = 8.1$  Hz, 1H), 7.90 (d,  $J = 8.0$  Hz, 1H), 7.67 (d,  $J = 8.0$  Hz, 1H), 7.48 (t,  $J = 7.0$  Hz, 1H), 7.38 (t,  $J = 7.9$  Hz, 1H), 7.15 (s, 1H), 7.11 (d,  $J =$

8.0, 1H), 2.64 (s, 3H), 2.38 (s, 3H);  $^{13}\text{C}$ -NMR (100 MHz,  $\text{CDCl}_3$ , ppm):  $\delta$  168.2, 153.8, 140.2, 137.1, 135.5, 132.3, 130.5, 130.3, 126.8, 126.0, 124.9, 123.2, 121.3, 21.3, 21.3; mp: 111-113  $^\circ\text{C}$  (lit. 111-113  $^\circ\text{C}$ ).

**2-(2-Ethylphenyl) benzothiazole (3af, CAS: 50685-15-9)<sup>[4]</sup>**

The product was isolated as yellow solid in 59% yield (70 mg).

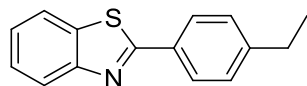

$^1\text{H}$ -NMR (400 MHz,  $\text{CDCl}_3$ , ppm):  $\delta$  8.05 (d,  $J$  = 8.2 Hz, 1H), 8.00 (d,  $J$  = 8.0 Hz, 2H), 7.87 (d,  $J$  = 7.8 Hz, 1H), 7.47 (t,  $J$  = 7.6 Hz, 1H), 7.36 (t,  $J$  = 7.5 Hz, 1H), 7.31 (d,  $J$  = 8.0 Hz, 2H), 2.71 (q,  $J$  = 7.6 Hz, 2H), 1.28 (t,  $J$  = 7.6 Hz, 3H);  $^{13}\text{C}$ -NMR (100 MHz,  $\text{CDCl}_3$ , ppm):  $\delta$  168.2, 154.2, 147.6, 134.9, 131.2, 128.5, 127.6, 126.2, 125.0, 123.0, 121.5, 28.8, 15.3; mp: 85-87  $^\circ\text{C}$ .

**2-(4-tert-Butylphenyl) benzothiazole (3ag, CAS: 56048-52-3)<sup>[4]</sup>**

The product was isolated as white solid in 57% yield (75.7 mg).

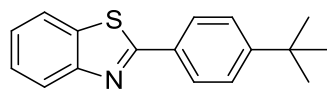

$^1\text{H}$ -NMR (400 MHz,  $\text{CDCl}_3$ , ppm):  $\delta$  8.06 (d,  $J$  = 8.6 Hz, 1H), 8.02 (d,  $J$  = 8.6 Hz, 1H), 7.88 (d,  $J$  = 7.8 Hz, 1H), 7.52-7.45 (m, 3H), 7.36 (t,  $J$  = 7.2 Hz, 1H), 1.36 (s, 9H);  $^{13}\text{C}$ -NMR (100 MHz,  $\text{CDCl}_3$ , ppm):  $\delta$  168.1, 154.5, 154.2, 135.0, 130.9, 127.3, 126.2, 126.0, 125.0, 123.1, 121.5, 35.0, 31.2; mp: 107-108  $^\circ\text{C}$  (lit. 107-108  $^\circ\text{C}$ ).

**2-(Naphthalen-1-yl) benzothiazole (3ah, CAS: 56048-50-1)<sup>[6]</sup>**

The product was isolated as yellow oil in 60% yield (100.7 mg).

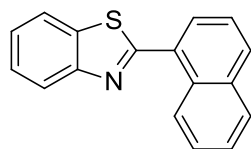

$^1\text{H}$ -NMR (400 MHz,  $\text{CDCl}_3$ , ppm):  $\delta$  8.93 (d,  $J$  = 8.6 Hz, 1H), 8.19 (d,  $J$  = 8.2 Hz, 1H), 7.99-7.91 (m, 4H), 7.63-7.52 (m, 4H), 7.44 (t,  $J$  = 7.6 Hz, 1H);  $^{13}\text{C}$ -NMR (100 MHz,  $\text{CDCl}_3$ , ppm):  $\delta$  167.6, 154.1, 135.4, 134.0, 131.1, 130.8, 129.4, 128.4, 127.6, 126.5, 126.3, 125.9, 125.3, 125.0, 123.5, 121.4.

### 2-(Naphthalen-2-yl) benzothiazole (3ai, CAS: 56048-51-2) <sup>[8]</sup>

The product was isolated as white solid in 47 % yield (79.3 mg).

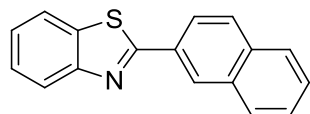

<sup>1</sup>H-NMR (400 MHz, CDCl<sub>3</sub>, ppm):  $\delta$  8.56 (d,  $J$  = 1.2 Hz, 1H), 8.20 (dd,  $J$  = 8.7 Hz, 1H), 8.11 (d,  $J$  = 8.2 Hz, 1H), 7.98-7.86 (m, 4H), 7.56-7.49 (m, 3H), 7.40 (t,  $J$  = 7.6 Hz, 1H); <sup>13</sup>C-NMR (100 MHz, CDCl<sub>3</sub>, ppm):  $\delta$  168.1, 154.2, 135.1, 134.6, 133.2, 131.0, 128.9, 128.8, 127.9, 127.6, 127.4, 126.9, 126.4, 125.2, 124.4, 123.2, 121.6; mp: 125-127 °C (lit. 125-127 °C).

### 2-(4-Methoxyphenyl) benzothiazole (3aj, CAS: 6265-92-5) <sup>[2]</sup>

The product was isolated as white solid in 46% yield (55.7 mg).

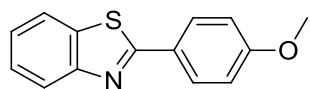

<sup>1</sup>H-NMR (400 MHz, CDCl<sub>3</sub>, ppm):  $\delta$  8.02 (d,  $J$  = 8.7 Hz, 3H), 7.85 (d,  $J$  = 7.9 Hz, 1H), 7.46 (t,  $J$  = 7.4 Hz, 1H), 7.34 (t,  $J$  = 7.6 Hz, 1H), 6.98 (d,  $J$  = 8.7 Hz, 2H), 3.86 (s, 3H); <sup>13</sup>C-NMR (100 MHz, CDCl<sub>3</sub>, ppm):  $\delta$  167.8, 161.9, 154.2, 134.8, 129.1, 126.4, 126.2, 124.7, 122.8, 121.5, 114.3, 55.4; mp: 123-125 °C (lit. 122-124 °C).

### 2-(2-Methoxyphenyl) benzothiazole (3ak, CAS: 6269-47-2) <sup>[3]</sup>

The product was isolated as white solid in 46% yield (55 mg).

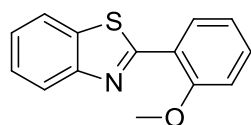

<sup>1</sup>H-NMR (400 MHz, CDCl<sub>3</sub>, ppm):  $\delta$  8.53 (dd,  $J$  = 7.9 Hz, 1H), 8.08 (d,  $J$  = 7.9 Hz, 1H), 7.91 (d,  $J$  = 7.9 Hz, 1H), 7.50-7.43 (m, 2H), 7.36 (t,  $J$  = 7.2 Hz, 1H), 7.12 (t,  $J$  = 7.6 Hz, 1H), 7.05 (d,  $J$  = 8.7 Hz, 1H), 4.04 (s, 3H); <sup>13</sup>C-NMR (100 MHz, CDCl<sub>3</sub>, ppm):  $\delta$  163.1, 157.2, 152.1, 136.1, 131.7, 129.5, 125.8, 124.5, 122.8, 122.3, 121.2, 121.1, 111.7, 55.7; mp: 105-106 °C (lit. 103-105 °C).

### 2-(3, 4-Dimethoxyphenyl) benzothiazole (3al, CAS: 6638-45-5) <sup>[7]</sup>

The product was isolated as white solid in 55% yield (74.9 mg).

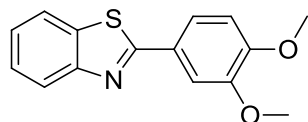

$^1\text{H-NMR}$  (400 MHz,  $\text{CDCl}_3$ , ppm):  $\delta$  8.03 (d,  $J = 8.0$  Hz, 1H), 7.86 (d,  $J = 8.0$  Hz, 1H), 7.70 (d,  $J = 2$  Hz, 1H), 7.58 (dd,  $J = 8.3$  Hz, 1H), 7.34 (t,  $J = 3.5$  Hz, 1H), 6.92 (d,  $J = 8.4$  Hz, 1H), 4.01 (s, 3H), 3.93(s, 3H);  $^{13}\text{C-NMR}$  (100 MHz,  $\text{CDCl}_3$ , ppm):  $\delta$  167.8, 154.1, 151.5, 149.3, 134.8, 126.6, 126.2, 124.8, 122.8, 121.4, 121.1, 111.0, 109.7, 56.1, 56.0; mp: 130-131  $^\circ\text{C}$  (lit. 130-131  $^\circ\text{C}$ ).

### 2-(2, 4-Dimethoxyphenyl) benzothiazole (3am, CAS: 56048-59-0) <sup>[5]</sup>

The product was isolated as light purple solid in 45% yield (61.4 mg).

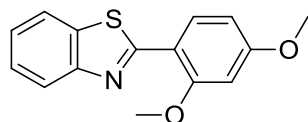

$^1\text{H-NMR}$  (400 MHz,  $\text{CDCl}_3$ , ppm):  $\delta$  8.46 (d,  $J = 8.8$  Hz, 1H), 8.03 (d,  $J = 8.2$  Hz, 1H), 7.87 (d,  $J = 7.8$  Hz, 1H), 7.44 (t,  $J = 7.2$ Hz, 1H), 7.31 (t,  $J = 7.4$  Hz, 1H), 6.65 (dd,  $J = 8.8$  Hz ,1H), 6.53 (d,  $J = 2.4$  Hz, 1H), 3.98 (s, 3H), 3.84 (s, 3H) ;  $^{13}\text{C-NMR}$ (100 MHz,  $\text{CDCl}_3$ , ppm):  $\delta$  163.2, 162.8, 158.5, 152.2, 135.6, 130.7, 125.7, 124.1, 122.3, 121.0, 115.6, 105.9, 98.4, 55.6, 55.4; mp: 125-127  $^\circ\text{C}$  (lit. 125-127  $^\circ\text{C}$ ).

### 2-(4-Chlorophenyl) benzothiazole (3an, CAS: 6269-46-1) <sup>[3]</sup>

The product was isolated as white solid in 72% yield (88.7 mg).

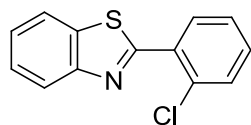

$^1\text{H-NMR}$  (400 MHz,  $\text{CDCl}_3$ , ppm):  $\delta$  8.22-8.20(m, 1H), 8.13 (d,  $J = 8.2$  Hz, 1H), 7.54-7.50 (m, 2H), 7.44-7.39 (m, 3H);  $^{13}\text{C-NMR}$  (100 MHz,  $\text{CDCl}_3$ , ppm):  $\delta$  164.1, 152.5, 136.1, 132.7, 132.3, 131.7, 131.1, 130.8, 127.1, 126.3, 125.4, 123.4, 121.4; mp: 83-84  $^\circ\text{C}$  (lit. 84-85  $^\circ\text{C}$ ).

### 2-(3-Chlorophenyl) benzothiazole (3ao, CAS: 22868-31-1) <sup>[3]</sup>

The product was isolated as white solid in 61% yield (74.7 mg).

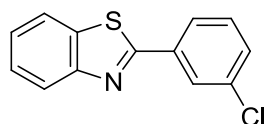

$^1\text{H-NMR}$  (400 MHz,  $\text{CDCl}_3$ , ppm):  $\delta$  8.12 (s, 1H), 8.08 (d,  $J = 8.2$  Hz, 1H), 7.94 (d,  $J = 7.4$  Hz, 1H), 7.91 (d,  $J = 8.0$  Hz, 1H), 7.51 (d,  $J = 7.4$  Hz, 1H), 7.49-7.39 (m, 3H);  $^{13}\text{C-NMR}$  (100 MHz,  $\text{CDCl}_3$ , ppm):  $\delta$  166.2, 154.0, 135.3, 135.1, 135.1, 130.8, 130.2, 127.4, 126.5, 125.7, 125.5, 123.4, 121.7; mp: 97-99  $^\circ\text{C}$  (lit. 97-98  $^\circ\text{C}$ ).

### 2-(4-Chlorophenyl) benzothiazole (3ap, CAS: 6265-91-4)<sup>[1]</sup>

The product was isolated as white solid in 73% yield (89.5 mg).

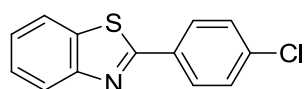

$^1\text{H-NMR}$  (400 MHz,  $\text{CDCl}_3$ , ppm):  $\delta$  8.06 (d,  $J = 8.2$  Hz, 1H), 8.03 (d,  $J = 8.5$  Hz, 2H), 7.90 (d,  $J = 8.0$  Hz, 1H), 7.52-7.46 (m, 3H), 7.40 (t,  $J = 7.4$  Hz, 1H);  $^{13}\text{C-NMR}$  (100 MHz,  $\text{CDCl}_3$ , ppm):  $\delta$  166.6, 154.1, 137.0, 135.1, 132.1, 129.3, 128.7, 126.5, 125.4, 123.3, 121.6; mp: 115-117  $^\circ\text{C}$  (lit. 115-117  $^\circ\text{C}$ ).

### 2-(4-Bromophenyl) benzothiazole (3aq, CAS: 19654-19-4)<sup>[1]</sup>

The product was isolated as white solid in 65% yield (94.2 mg).

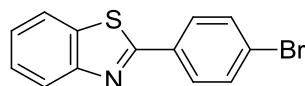

$^1\text{H-NMR}$  (400 MHz,  $\text{CDCl}_3$ , ppm):  $\delta$  8.06 (d,  $J = 8.2$  Hz, 1H), 7.95 (d,  $J = 8.6$  Hz, 2H), 7.89 (d,  $J = 7.8$  Hz, 1H), 7.64-7.60 (m, 2H), 7.50 (t,  $J = 7.4$  Hz, 1H), 7.39 (t,  $J = 7.6$  Hz, 1H);  $^{13}\text{C-NMR}$  (100 MHz,  $\text{CDCl}_3$ , ppm):  $\delta$  166.7, 154.1, 135.0, 132.5, 132.2, 128.9, 126.5, 125.4, 125.4, 123.3, 121.6; mp: 129-131  $^\circ\text{C}$  (lit. 131-132  $^\circ\text{C}$ ).

### 2-(4-Fluorophenyl) benzothiazole (3ar, CAS: 1629-26-1)<sup>[1]</sup>

The product was isolated as white solid in 40% yield (45.8 mg).

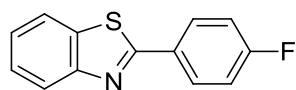

$^1\text{H-NMR}$  (400 MHz,  $\text{CDCl}_3$ , ppm):  $\delta$  8.09-8.04 (m, 3H), 7.88 (d,  $J = 7.9$  Hz, 1H), 7.49 (t,  $J = 7.8$  Hz, 1H), 7.38 (t,  $J = 7.6$  Hz, 1H), 7.20-7.14 (m, 2H);  $^{13}\text{C-NMR}$  (100 MHz,  $\text{CDCl}_3$ , ppm):

$\delta$  166.2 (d,  $J$  = 101.9 Hz), 163.2, 154.1, 135.0, 130.0 (d,  $J$  = 3.1 Hz), 129.5 (d,  $J$  = 8.6 Hz), 126.4, 125.2, 123.2, 121.6, 116.1 (d,  $J$  = 22.0 Hz); mp: 98-100 °C (lit. 99-100 °C).

### 2-(2-Fluorophenyl) benzothiazole (3as, CAS: 1747-46-2)<sup>[3]</sup>

The product was isolated as white solid in 42% yield (48.4 mg).

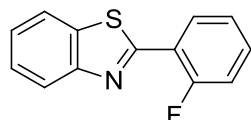

<sup>1</sup>H-NMR (400 MHz, CDCl<sub>3</sub>, ppm):  $\delta$  8.41 (t,  $J$  = 7.6 Hz, 1H), 8.12 (d,  $J$  = 8.0 Hz, 1H), 7.94 (d,  $J$  = 8.0 Hz, 1H), 7.46 (m, 3H), 7.30 (t,  $J$  = 7.9 Hz, 2H), 7.30 (d,  $J$  = 7.6 Hz, 1H), 7.22 (d,  $J$  = 7.6 Hz, 1H); <sup>13</sup>C-NMR (100 MHz, CDCl<sub>3</sub>, ppm):  $\delta$  162.0, 160.2 (d,  $J$  = 180.7 Hz), 152.5, 135.7 (d,  $J$  = 7.9 Hz), 132.1 (d,  $J$  = 8.7 Hz), 129.7 (d,  $J$  = 2.1 Hz), 126.3, 125.3, 124.7, 124.6, 123.3, 121.4, 116.4 (d,  $J$  = 21.8 Hz); mp: 67-68 °C (lit. 67-68 °C).

### 2-(4-Trifluoromethylphenyl) benzothiazole (3at, CAS: 134384-31-9)<sup>[2]</sup>

The product was isolated as white solid in 65% yield (90.7 mg).

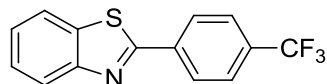

<sup>1</sup>H-NMR (400 MHz, CDCl<sub>3</sub>, ppm):  $\delta$  8.21 (d,  $J$  = 8.3 Hz, 2H), 8.11 (d,  $J$  = 8.1 Hz, 1H), 7.93 (d,  $J$  = 8.0 Hz, 1H), 7.75 (d,  $J$  = 8.3 Hz, 2H), 7.53 (t,  $J$  = 7.4 Hz, 1H), 7.43 (t,  $J$  = 7.5 Hz, 1H); <sup>13</sup>C-NMR (100 MHz, CDCl<sub>3</sub>, ppm):  $\delta$  166.0, 154.0, 136.8, 135.2, 132.3 (q,  $J$  = 32.6 Hz), 127.8, 126.7, 126.0 (q,  $J$  = 3.7 Hz), 123.7 (q,  $J$  = 270.8 Hz), 123.6, 121.7; mp: 160-161 °C (lit. 160-161 °C).

### 2-(3-Cyanophenyl) benzothiazole (3au, CAS: 67362-99-6)<sup>[8]</sup>

The product was isolated as white solid in 62% yield (72.9 mg).

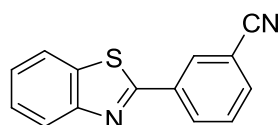

<sup>1</sup>H-NMR (400 MHz, CDCl<sub>3</sub>, ppm):  $\delta$  8.40 (s, 1H), 8.29 (d,  $J$  = 7.9 Hz, 2H), 8.10 (d,  $J$  = 8.2 Hz, 1H), 7.93 (d,  $J$  = 8.0 Hz, 1H), 7.75 (d,  $J$  = 7.6 Hz, 1H), 7.61 (t,  $J$  = 7.9 Hz, 1H), 7.53 (t,  $J$



= 7.6 Hz, 1H), 7.44(t,  $J$  = 7.4 Hz, 1H);  $^{13}\text{C}$ -NMR (100 MHz,  $\text{CDCl}_3$ , ppm):  $\delta$  165.0, 153.9, 135.1, 134.8, 133.8, 131.4, 130.8, 129.9, 126.8, 125.9, 123.6, 121.8, 118.0, 113.5; mp: 156-158 °C (lit. 158°C).

**2-(4-Cyanophenyl) benzothiazole (3av, CAS: 17930-02-8)**<sup>[6]</sup>

The product was isolated as white solid in 70% yield (82.8 mg).

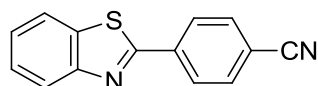

$^1\text{H}$ -NMR (400 MHz,  $\text{CDCl}_3$ , ppm):  $\delta$  8.19 (d,  $J$  = 8.2 Hz, 2H), 8.10 (d,  $J$  = 8.0 Hz, 1H), 7.93 (d,  $J$  = 7.9 Hz, 1H), 7.77 (d,  $J$  = 8.3 Hz, 2H), 7.54 (t,  $J$  = 7.0 Hz, 1H), 7.44 (t,  $J$  = 7.6 Hz, 1H);  $^{13}\text{C}$ -NMR (100 MHz,  $\text{CDCl}_3$ , ppm):  $\delta$  165.3, 154.0, 137.4, 135.3, 132.7, 127.9, 126.8, 126.0, 123.8, 121.8, 118.2, 114.1; mp: 165-167 °C (lit. 165-166 °C).

**6-Chloro-2-phenylbenzothiazole (3ba, CAS: 952-16-9)**<sup>[12]</sup>

The product was isolated as white solid in 75% yield (91.7 mg).

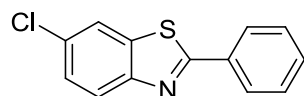

$^1\text{H}$ -NMR (400 MHz,  $\text{CDCl}_3$ , ppm):  $\delta$  8.07-8.04 (m, 3H), 7.98 (d,  $J$  = 8.6 Hz, 1H), 7.50-7.48 (m, 3H), 7.34 (dd,  $J$  = 8.7 Hz, 1H);  $^{13}\text{C}$ -NMR (100 MHz,  $\text{CDCl}_3$ , ppm):  $\delta$  169.9, 155.0, 133.3, 133.2, 132.3, 131.3, 129.1, 127.6, 125.6, 123.0, 122.3; mp: 139-141 °C (lit. 138-140 °C).

**6-Chloro-2-(4-chlorophenyl) benzothiazole (3bp, CAS: 15952-14-4)**<sup>[10]</sup>

The product was isolated as white solid in 58% yield (81.8 mg).

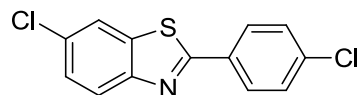

$^1\text{H}$ -NMR (400 MHz,  $\text{CDCl}_3$ , ppm):  $\delta$  8.03 (d,  $J$  = 2 Hz, 1H), 8.01-7.98 (m, 2H), 7.79 (d,  $J$  = 8.6 Hz, 1H), 7.46 (d,  $J$  = 8.6 Hz, 2H), 7.36 (dd,  $J$  = 8.4 Hz, 1H);  $^{13}\text{C}$ -NMR (100 MHz,  $\text{CDCl}_3$ , ppm):  $\delta$  168.4, 154.9, 137.5, 133.3, 132.5, 131.7, 129.3, 128.7, 125.9, 123.1, 122.3; mp: 140-142 °C (lit. 140-142 °C).

**6-methyl-2-phenylbenzothiazole (3ca, CAS: 10205-58-0)**<sup>[11]</sup>

This product was isolated as white solid in 79% yield (88.5 mg).

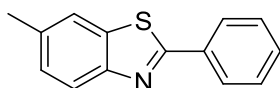

$^1\text{H-NMR}$  (400 MHz,  $\text{CDCl}_3$ , ppm):  $\delta$  8.07 (s, 1H), 7.95 (d,  $J = 8.2$  Hz, 1H), 7.69 (s, 1H), 7.48 (s, 3H), 7.30 (d,  $J = 8.0$  Hz, 1H), 2.50 (s, 3H);  $^{13}\text{C-NMR}$  (100 MHz,  $\text{CDCl}_3$ , ppm):  $\delta$  167.0, 152.3, 135.4, 135.2, 133.8, 130.7, 129.0, 128.0, 127.4, 122.7, 121.4, 21.5; mp: 125-127 °C (lit. 124-126 °C).

**6-methoxy-2-phenylbenzothiazole (3da, CAS: 10205-69-3)**<sup>[12]</sup>

This product was isolated as white solid in 63% yield (75.9 mg).

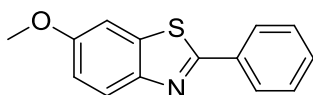

$^1\text{H-NMR}$  (400 MHz,  $\text{CDCl}_3$ , ppm):  $\delta$  8.04-8.02 (m, 2H), 7.94 (d,  $J = 8.9$  Hz, 1H), 7.48-7.45 (m, 3H), 7.33 (d,  $J = 2.8$  Hz, 1H), 7.08 (dd,  $J = 8.9$  Hz, 1H), 3.88 (s, 3H);  $^{13}\text{C-NMR}$  (100 MHz,  $\text{CDCl}_3$ , ppm):  $\delta$  165.5, 157.8, 148.7, 136.4, 133.8, 130.5, 128.9, 127.2, 123.7, 115.6, 104.2, 55.8; mp: 112-114 °C (lit. 112-112 °C).

**6-ethoxy-2-phenylbenzothiazole (3ea, CAS: 101096-95-1)**<sup>[13]</sup>

This product was isolated as white solid in 54% yield (64.2 mg).

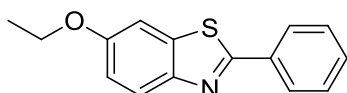

$^1\text{H-NMR}$  (400 MHz,  $\text{CDCl}_3$ , ppm):  $\delta$  8.03 (d,  $J = 8.0$  Hz, 2H), 7.93 (d,  $J = 8.9$  Hz, 1H), 7.48-7.45 (m, 3H), 7.33 (d,  $J = 2.5$  Hz, 1H), 7.07 (dd,  $J = 9.0$  Hz, 1H), 4.09 (q,  $J = 7.0$  Hz, 2H), 1.45 (t,  $J = 7.0$  Hz, 3H);  $^{13}\text{C-NMR}$  (100 MHz,  $\text{CDCl}_3$ , ppm):  $\delta$  165.4, 157.1, 148.6, 136.4, 133.8, 130.5, 128.9, 127.2, 123.7, 116.0, 104.9, 64.1, 14.8; mp: 113-115 °C (lit. 112-114 °C).

**6-nitro-2-phenylbenzothiazole (3fa, CAS: 38338-23-7)**<sup>[12]</sup>

This product was isolated as yellow solid in 36% (46.4 mg).

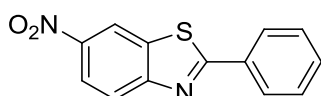

$^1\text{H-NMR}$  (400 MHz,  $\text{CDCl}_3$ , ppm):  $\delta$  8.83 (d,  $J = 2.2$  Hz, 1H), 8.36 (dd,  $J = 9.0$  Hz, 1H),

8.14-8.10 (m, 3H), 7.57-7.51(m, 3H);  $^{13}\text{C}$ -NMR (100 MHz,  $\text{CDCl}_3$ , ppm):  $\delta$  173.8, 157.8, 145.0, 135.3, 132.7, 132.2, 129.3, 127.9, 123.3, 121.9, 118.2; mp: 188-190 °C (lit. 191-192 °C).

**2-Butylbenzothiazole (3aw, CAS: 54798-95-7)** <sup>[14]</sup>

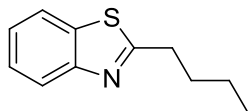

An oven-dried reaction tube(5 mL) was charged with benzothiazole (**1a**, 68 mg, 0.5 mmol), pentanal (**2v**, 64.5 mg, 0.75 mmol), 70% TBHP in water (207  $\mu\text{L}$ , 1.5 mmol), KI (17 mg, 0.01 mmol) and water 1 mL. The resulting solution was stirring at 100 °C under  $\text{N}_2$ . After 4h, additional penanal (64.5 mg, 0.75 mmol), 70% TBHP in water (207  $\mu\text{L}$ , 1.5 mmol), KI (17 mg, 0.01 mmol) was added into the reaction solution. The resulting solution was stirring at 100 °C under  $\text{N}_2$  for another 4h. Upon completion of the reaction, the mixture was extracted with ethyl acetate (10 mL  $\times$  3). The organic layers were combined, washed with saturated  $\text{Na}_2\text{S}_2\text{O}_3$  aqueous solution, saturated  $\text{NaHCO}_3$  aqueous solution, dried over anhydrous  $\text{Na}_2\text{SO}_4$ , and filtered. The solvents were removed via rotary evaporator and the residue was purified with flash chromatography (silica gel, petroleum ether/ethyl acetate = 100:1) to give 3aw as yellow oil; yield: 44.8 mg (47%).

$^1\text{H}$ -NMR (400 MHz,  $\text{CDCl}_3$ , ppm):  $\delta$  7.96 (d,  $J$  = 8.0 Hz 1H), 7.84 (d,  $J$  = 8.0 Hz, 1H), 7.44 (t,  $J$  = 7.5 Hz, 1H), 7.34 (t,  $J$  = 7.3 Hz, 1H), 3.12 (t,  $J$  = 7.6 Hz, 2H), 1.91-1.83 (m, 2H), 1.48 (t,  $J$  = 7.6 Hz, 2H), 0.98 (t,  $J$  = 7.6 Hz, 3H);  $^{13}\text{C}$ -NMR (100 MHz,  $\text{CDCl}_3$ , ppm):  $\delta$  177.6, 153.1, 134.6, 125.8, 124.5, 122.6, 121.5, 34.1, 31.8, 22.3, 13.8.

**2-Butylbenzothiazole (3ax, CAS: 40115-03-5)** <sup>[15]</sup>

The product was isolated as yellow oil in 46% yield (49.7 mg).

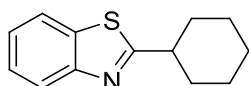

$^1\text{H}$ -NMR (400 MHz,  $\text{CDCl}_3$ , ppm):  $\delta$  7.97 (d,  $J$  = 8.1 Hz, 1H), 7.84 (d,  $J$  = 7.9 Hz, 1H), 7.44 (t,  $J$  = 7.6 Hz, 3H), 7.33 (t,  $J$  = 7.5 Hz, 1H), 3.10 (m, 1H), 2.20 (d,  $J$  = 12 Hz, 2H), 1.91-1.87 (m, 2H), 1.78-1.59 (m, 4H), 1.50-1.26 (m, 4H);  $^{13}\text{C}$ -NMR (100 MHz,  $\text{CDCl}_3$ , ppm):  $\delta$  177.6,

153.1, 134.5, 125.8, 124.5, 122.5, 121.5, 43.4, 33.4, 26.0, 25.8.

### The $^{13}\text{C}$ benzaldehyde labeled experiments

The isotope reagents was purchased from J&K. Benzaldehyde( $\alpha\text{-}^{13}\text{C}$ , 99%) was used without further purification.

$^{13}\text{C}$  Enrichments of afforded product was calculated from the integrated resonances detected by inverse gated decoupling  $^{13}\text{C}$  NMR. Carbon resonances were integrated and standardized to three different positions (C(154.2 ppm), C(126.3 ppm), C(125.2 ppm)). The ratio of the integrated signal form the labeled sample to unlabeled product was determined, and then the three sets were averaged. This quotient was multiplied by the natural abundance of  $^{13}\text{C}$  (1.1%) to give the percent  $^{13}\text{C}$  incorporations at the position of  $^{13}\text{C}$ -**3aa**.

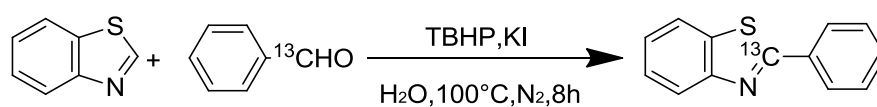

### 2-phenylbenzothiazole (3aa)

Inverse gated decoupling  $^{13}\text{C}$  NMR: (100 MHz,  $\text{CDCl}_3$ )  $\delta$  168.1 (int. = 0.93), 154.2 (int. = 1.00), 135.1, 133.6, 131.0, 129.0, 127.6, 126.3(int. = 4.44), 125.2(int. = 4.34), 123.2, 121.6.

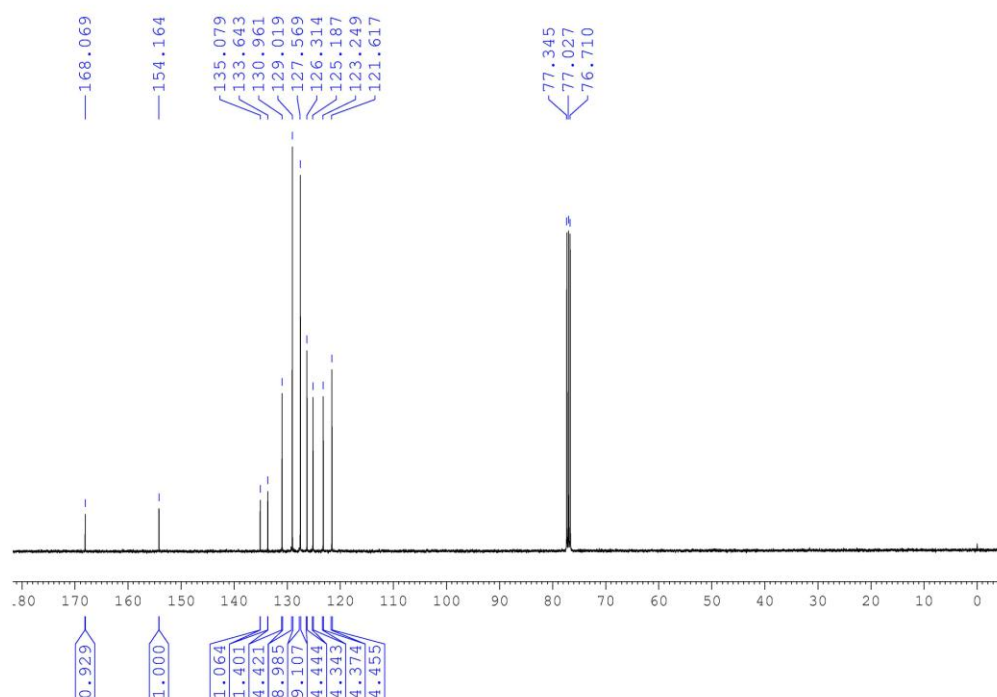

## 2-phenylbenzothiazole (<sup>13</sup>C-3aa)

Inverse gated decoupling <sup>13</sup>C NMR: (100 MHz, CDCl<sub>3</sub>) δ 168.1 (int. = 80.53), 154.2 (int. = 1.00), 135.1, 133.6, 131.0, 129.0, 127.6, 126.3 (int. = 4.06), 125.2 (int. = 3.86), 123.3, 121.6.

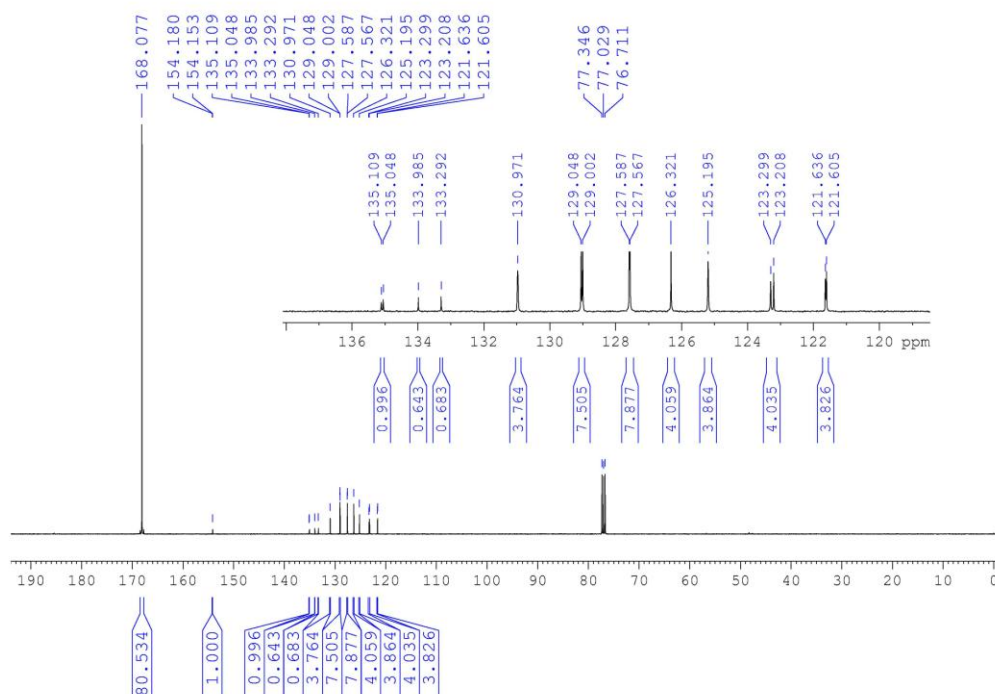

|                             |                     |        |
|-----------------------------|---------------------|--------|
| Authentic δ (ppm):          |                     | 168.07 |
| Labeled δ (ppm):            |                     | 168.08 |
| C(154.2 ppm):               | Ratio Labeled       | 80.53  |
|                             | Ratio Unlabeled     | 0.93   |
|                             | Labeled / Unlabeled | 87.53  |
| C(126.3 ppm):               | Ratio Labeled       | 19.83  |
|                             | Ratio Unlabeled     | 0.22   |
|                             | Labeled / Unlabeled | 90.14  |
| C(125.2 ppm):               | Ratio Labeled       | 20.86  |
|                             | Ratio Unlabeled     | 0.23   |
|                             | Labeled / Unlabeled | 90.70  |
| Average Labeled / Unlabeled |                     | 89.46  |
| Absolute Abundance (%)      |                     | 97.42  |

## References

- 1 Z. Duan, S. Ranjit, X. Liu, *Org. Lett.*, 2010, **12**, 2430.
- 2 J. K. Huang, J. Chan, Y. Chen et al., *J. Am. Chem. Soc.*, 2010, **132**, 3674.
- 3 Y. Mettey, S. Michaud, J. M. Vierfond, *Heterocycles*, 1994, **38**, 1001.
- 4 E. A. Jaseer, D. J. C. Prasad, A. Dandapat, G. Sekar, *Tetrahedron Lett.*, 2010, **51**, 5009.
- 5 Chin-Hsing Chou, Pin-Chih Yu, Bo-Chi Wang, *Tetrahedron Lett.*, 2005, **46**, 1349.
- 6 J. Canivet, J. Yamaguchi, I. Ban, K. Itami, *Org. Lett.*, 2009, **11**, 1733.
- 7 S. G. Modha, J. C. Trivedi et al., *Org. Chem.*, 2011, **76**, 846.
- 8 T. Yamamoto et al., *Chem. - Eur. J.*, 2011, **17**, 10113.
- 9 Z. Yang, X. Chen, S. Wang et al., *J. Org. Chem.* 2012, **77**, 7086.
- 10 Y. Heo et al., *Tetrahedron Lett.* 2006, **47**, 3091.
- 11 D. J. C. Prasad and G. Sekar, *Org. Lett.* 2011, **13**, 1008.
- 12 K. Inamoto, C. Hasegawa, K. Hiroya, T. Doi, *Org. Lett.* 2008, **10**, 5147.
- 13 S. Liu, R. Chen, X. Guo et al. *Green Chem.* 2012, **14**, 1577.
- 14 H. Deng, Z. Li, F. Ke, and X. Zhou, *Chem. - Eur. J.* 2012, **18**, 4840.
- 15 T. Yao, K. Hirano, T. Satoh, M. Miura, *Angew. Chem. Int. Ed.* 2012, **51**, 775.

# **<sup>1</sup>H NMR and <sup>13</sup>C NMR spectra of products**

**3aa**

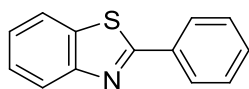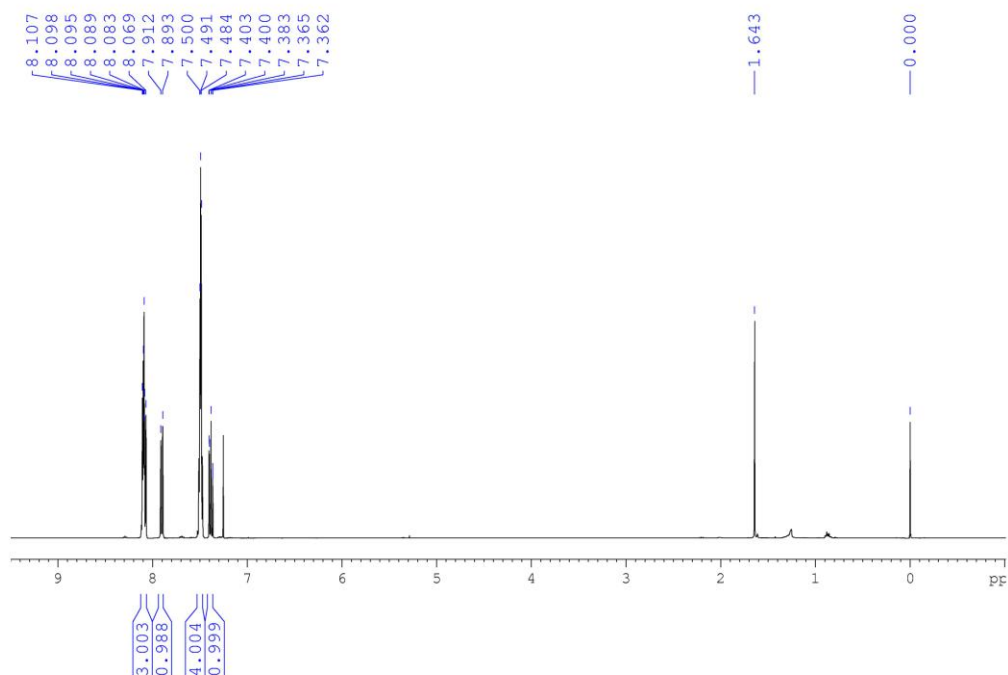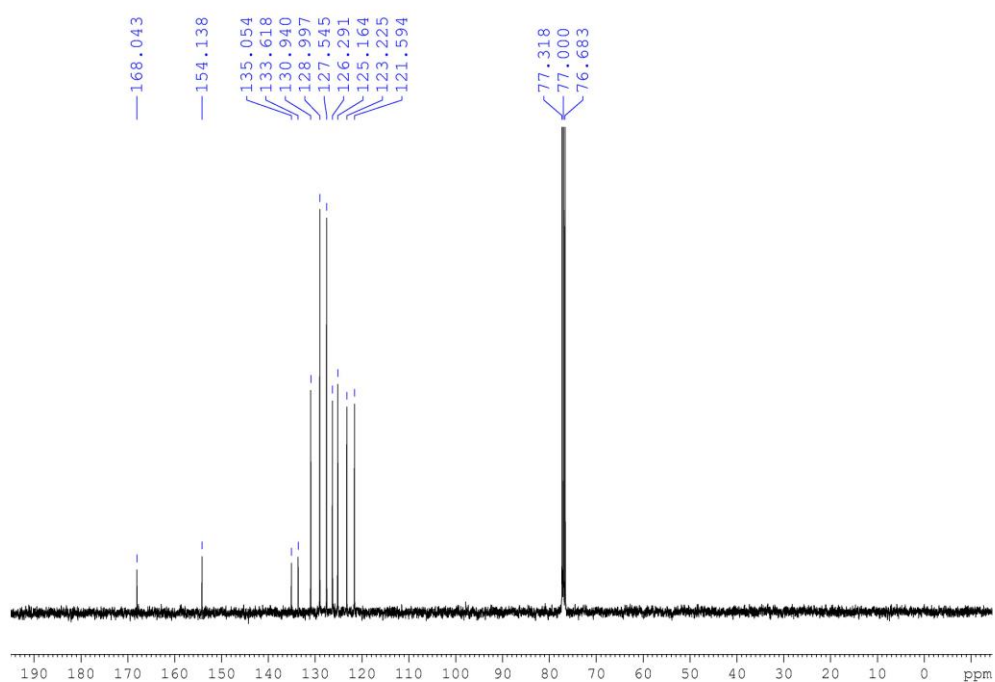

**3ab**

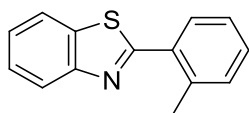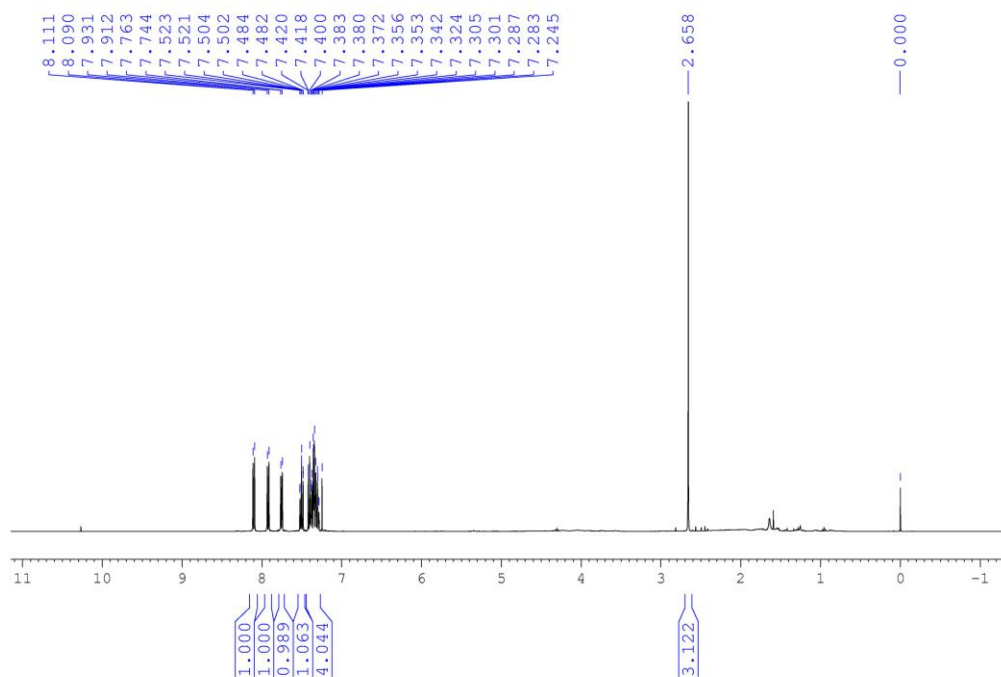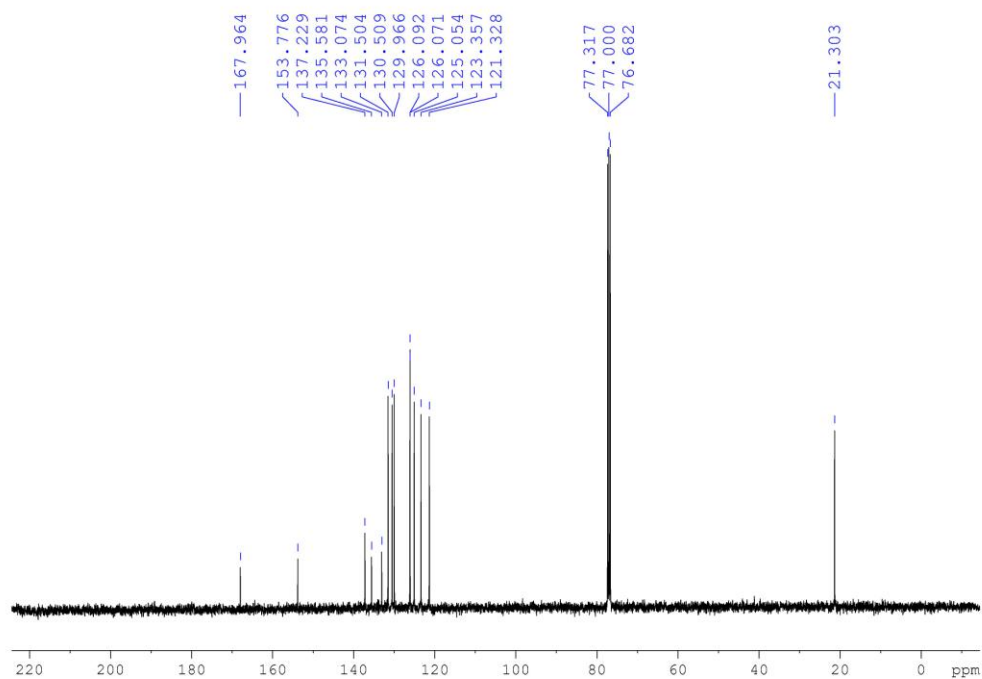



**3ac**

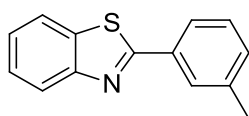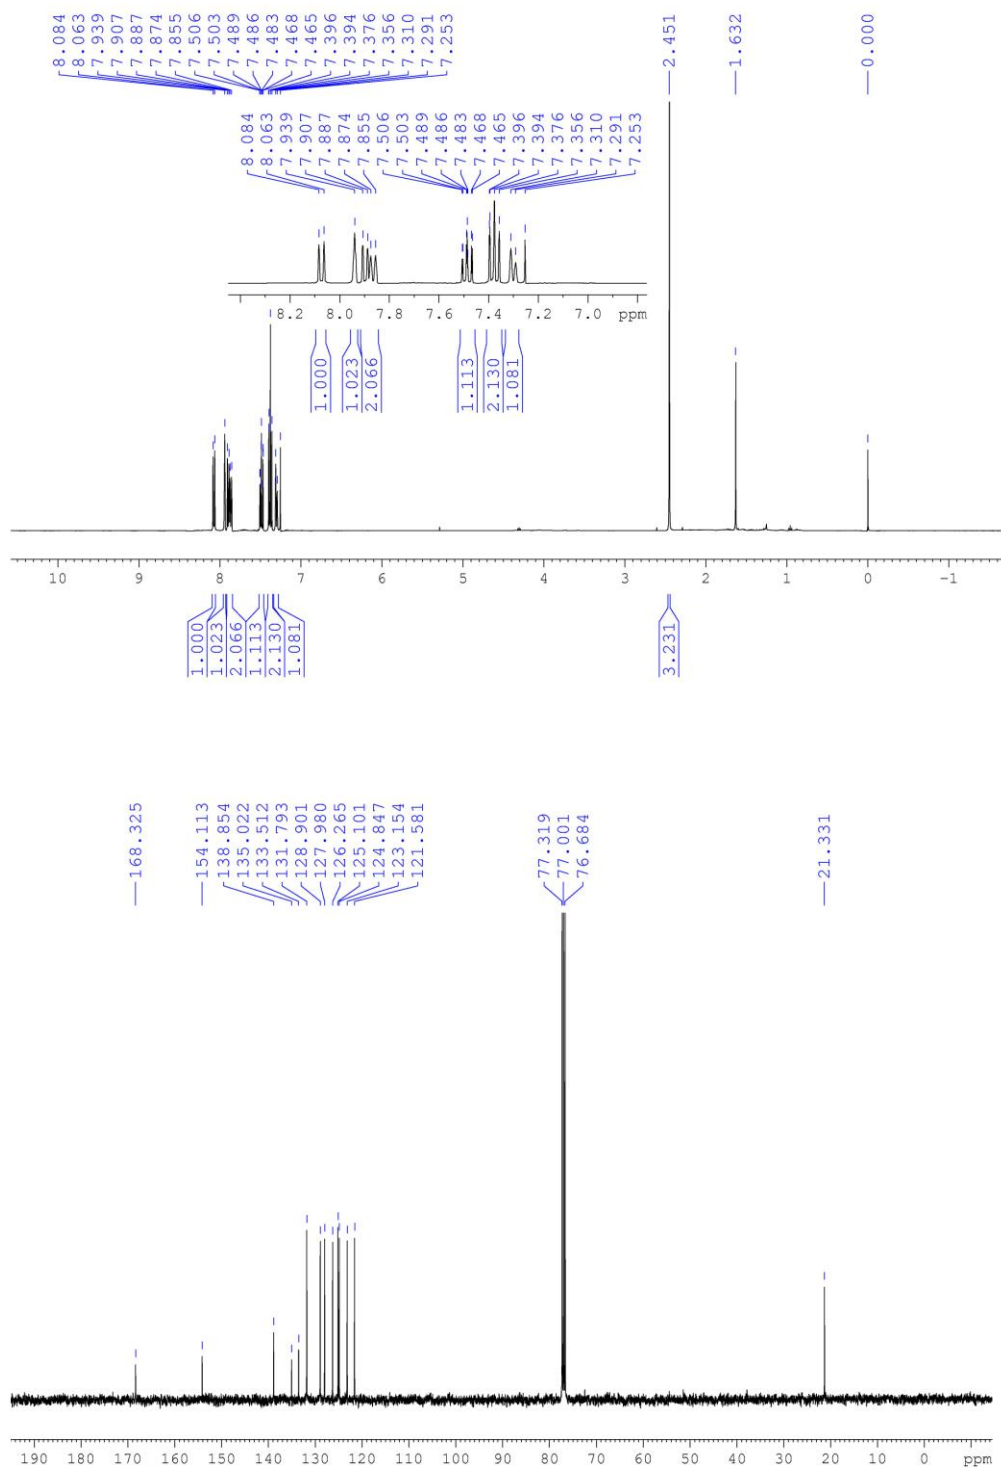

**3ad**

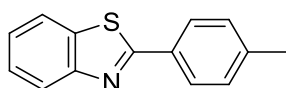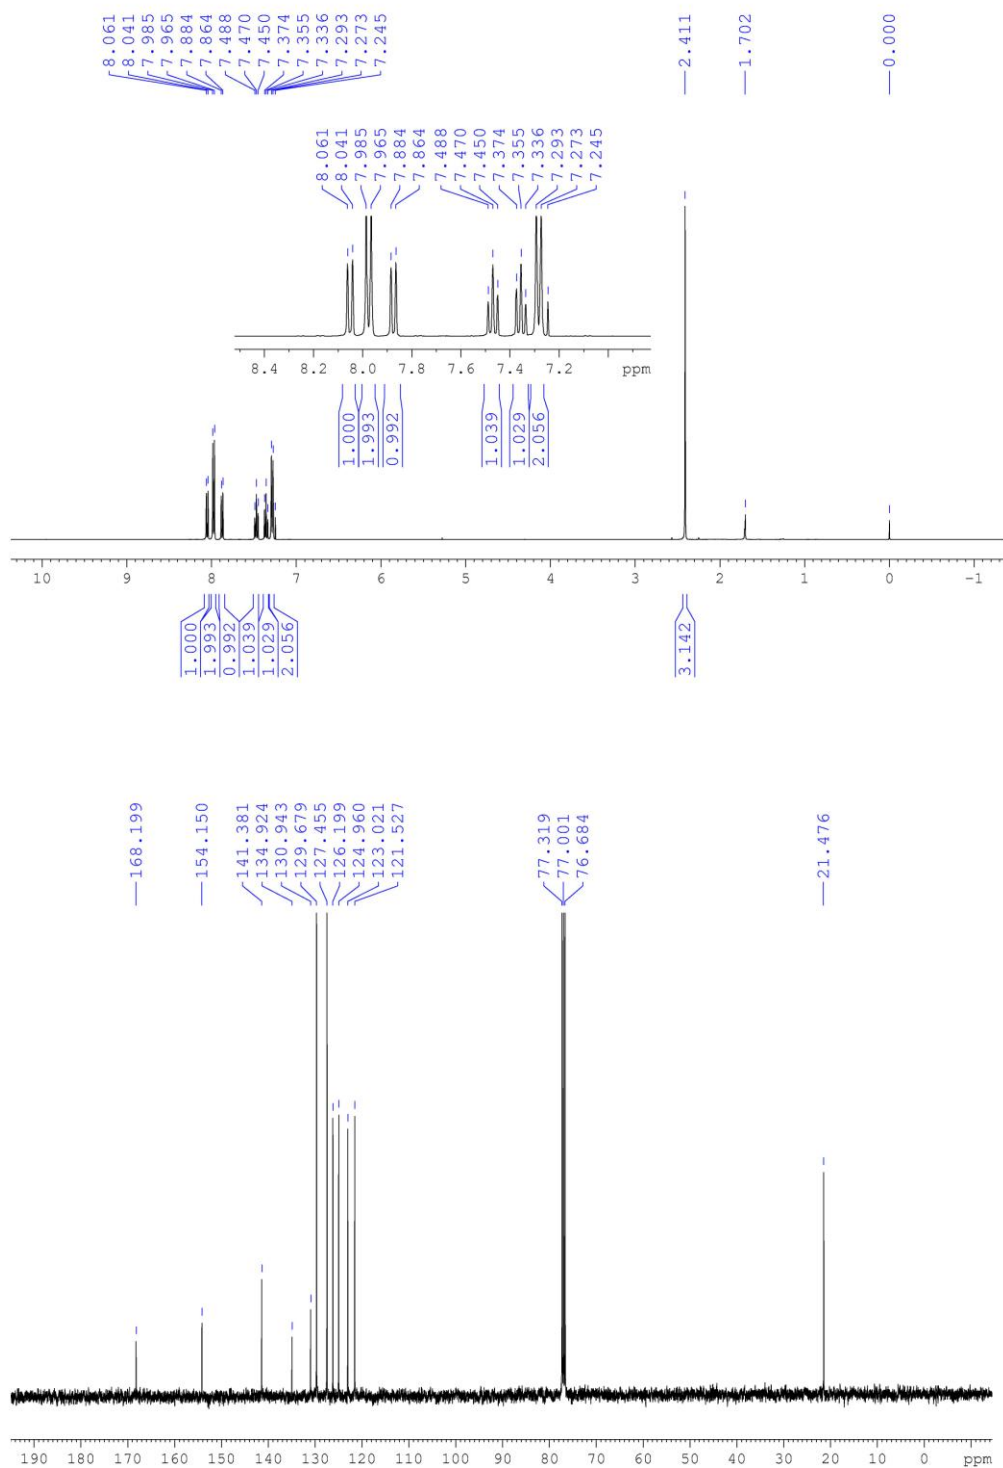

**3ae**

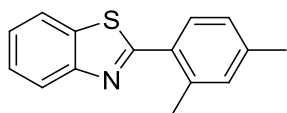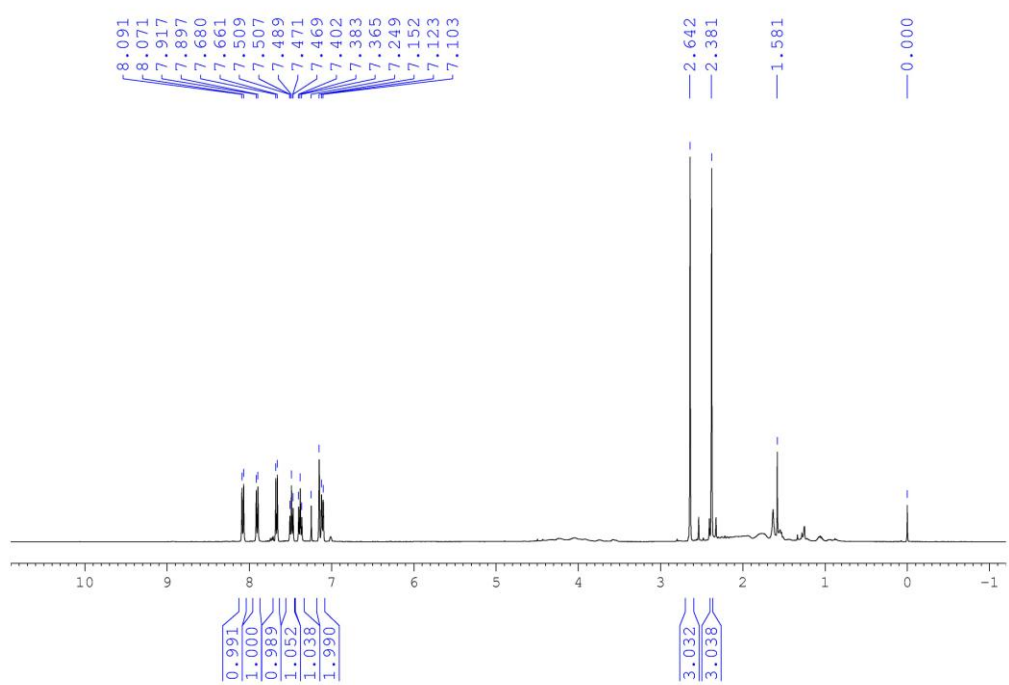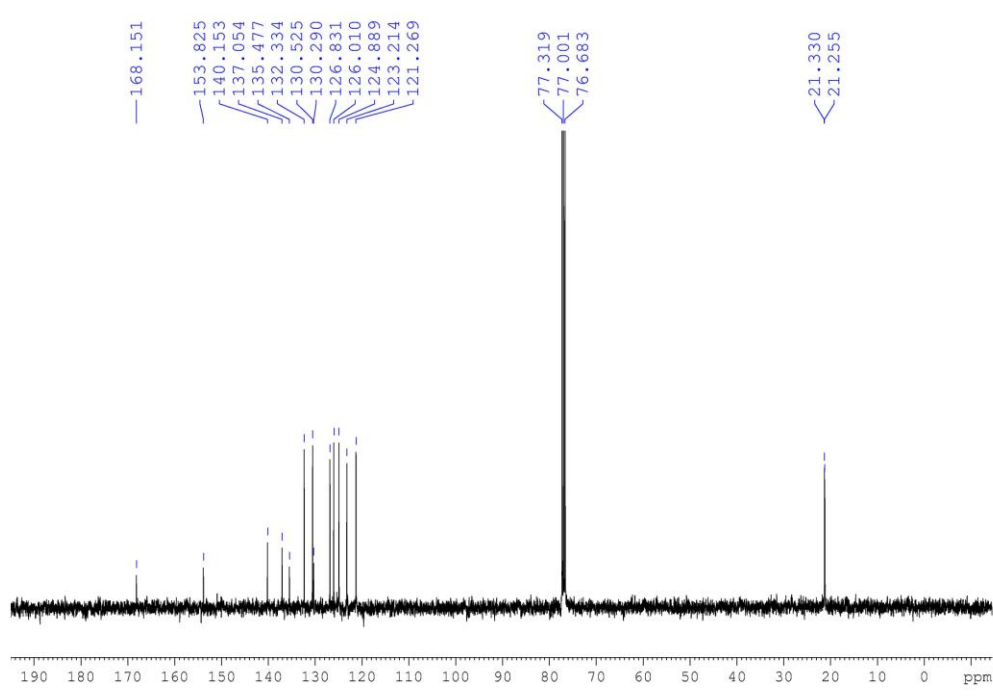

**3af**

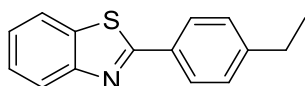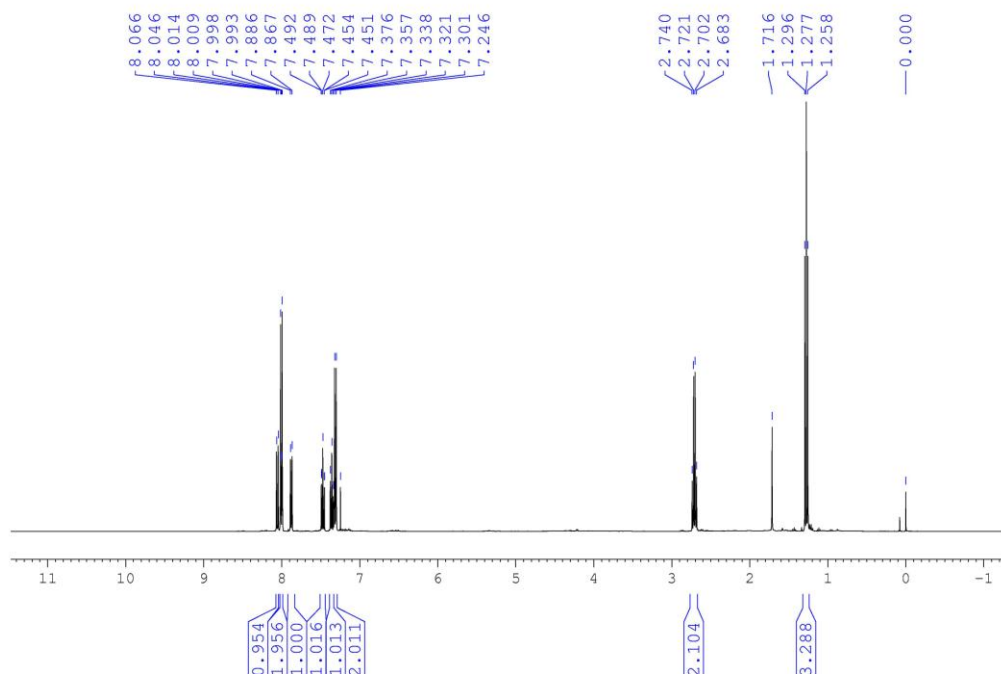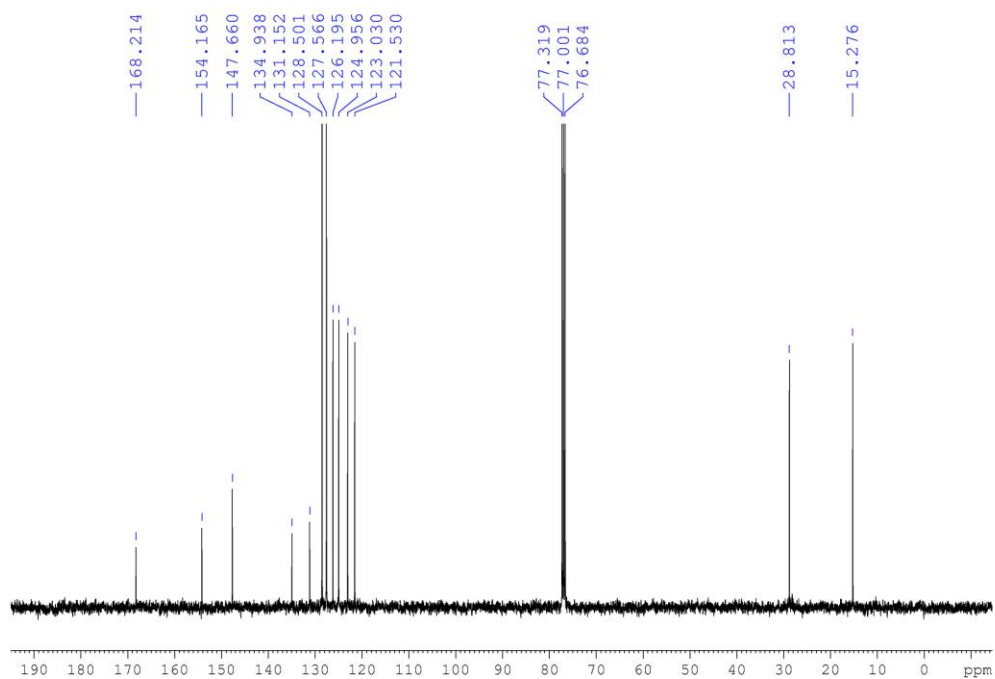

**3ag**

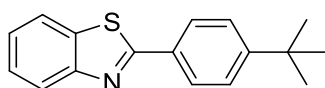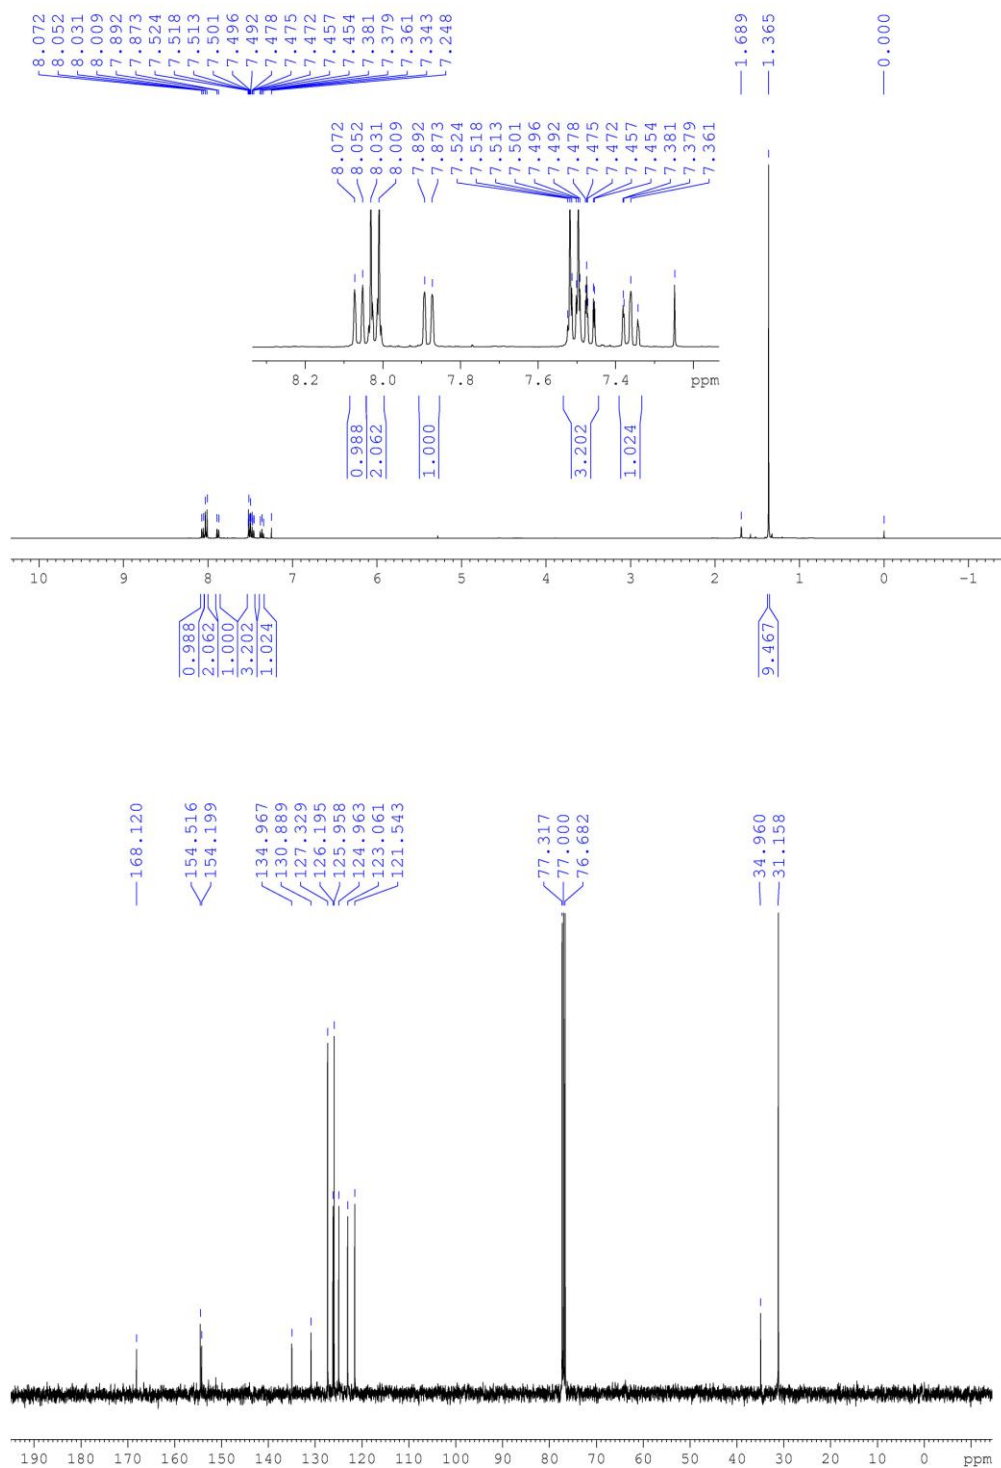

**3ah**

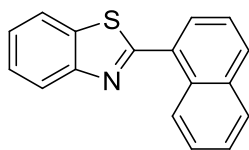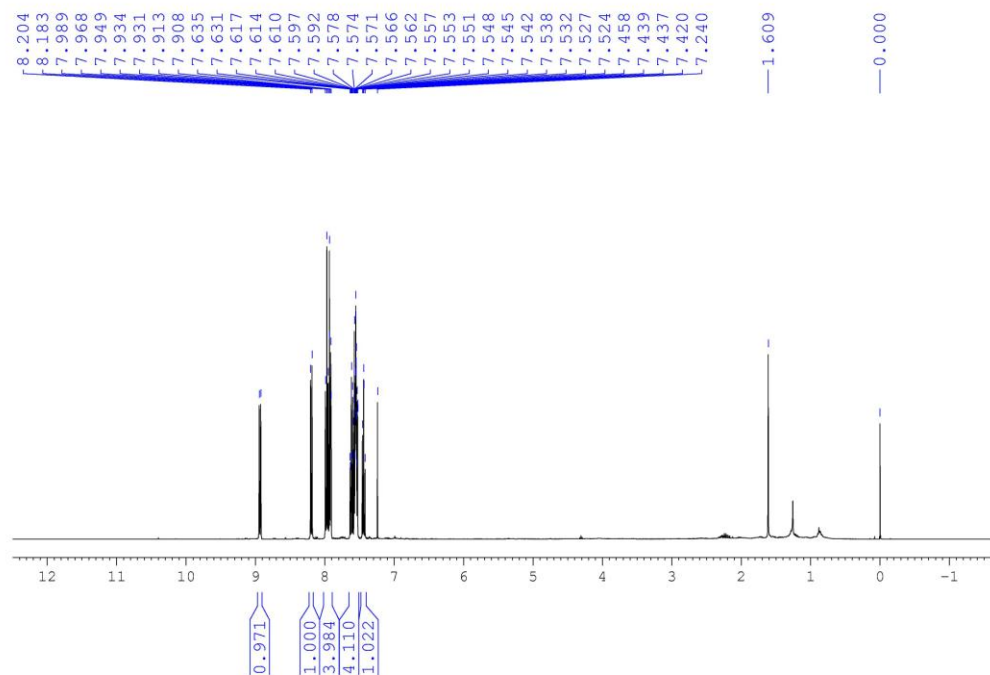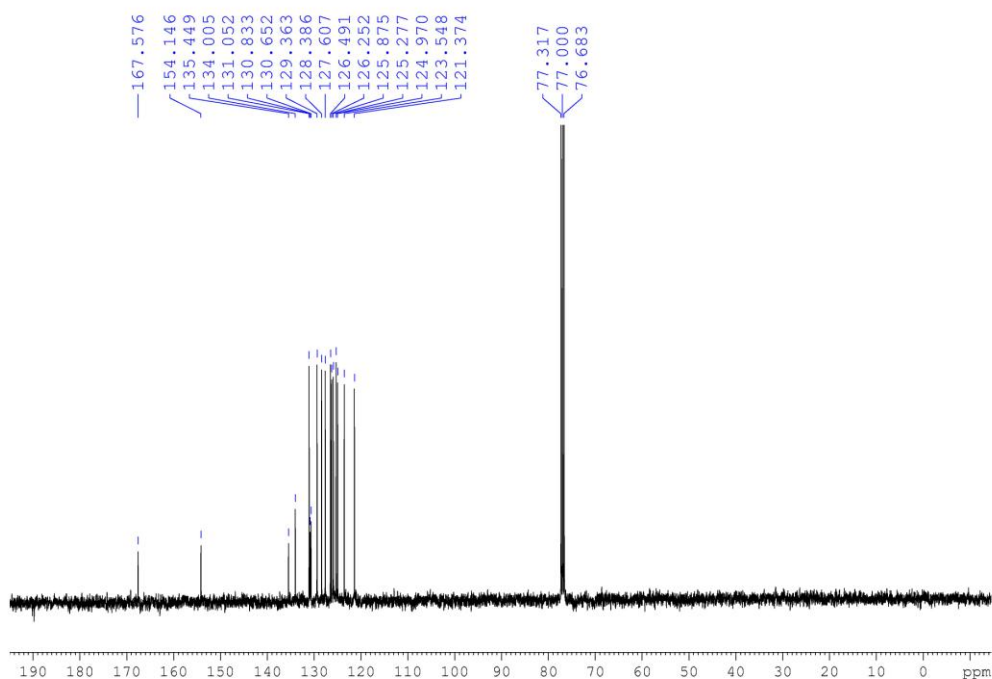

**3ai**

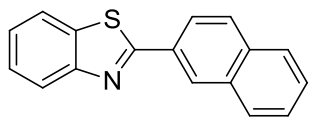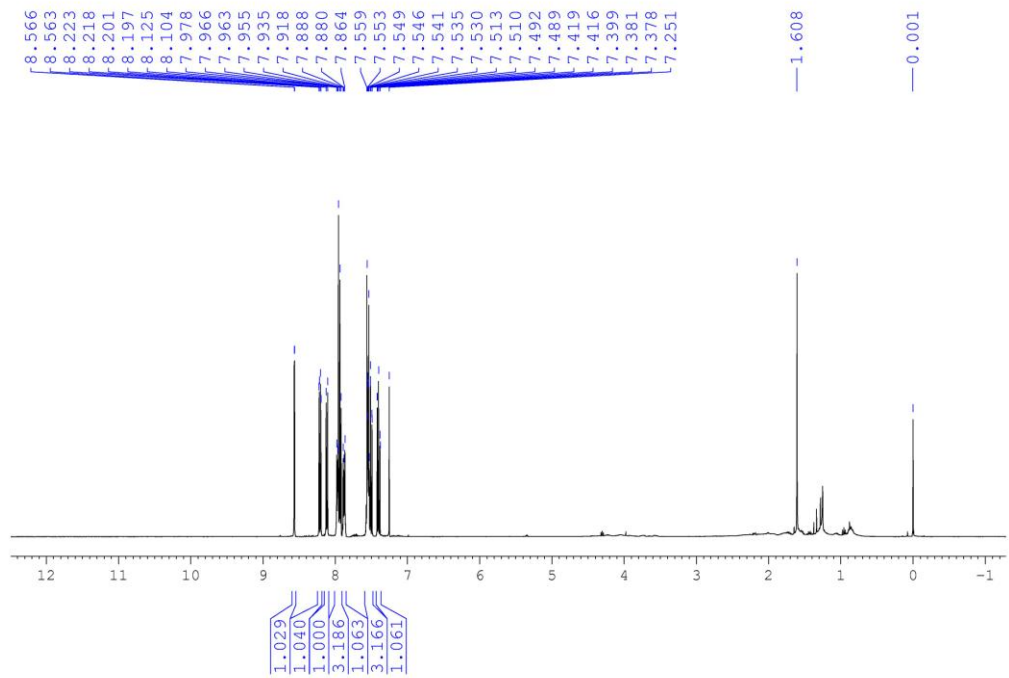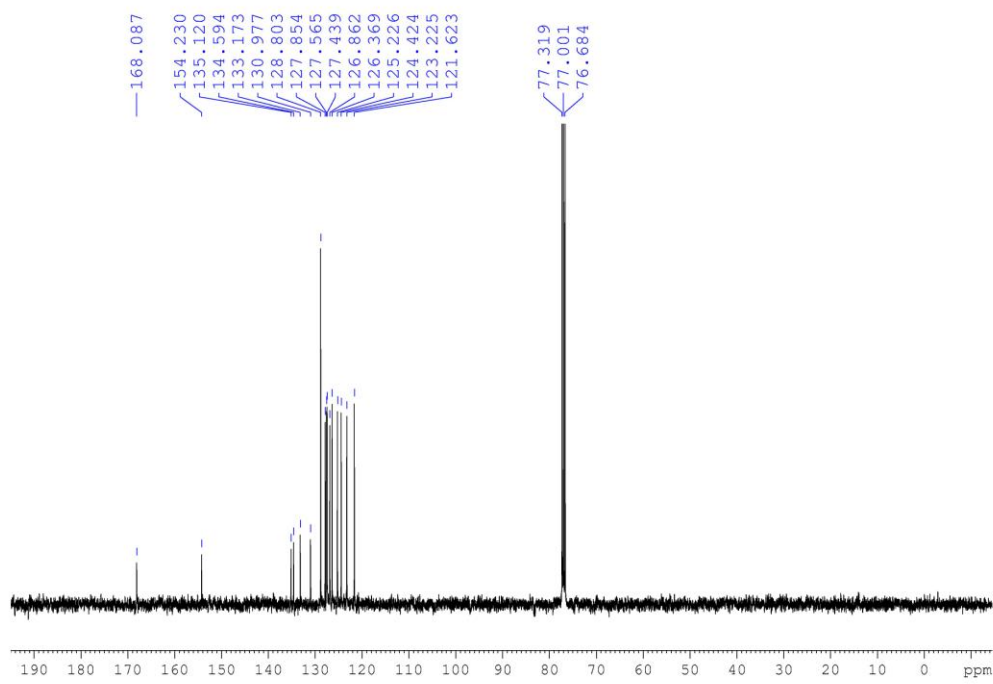

**3aj**

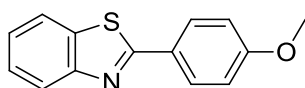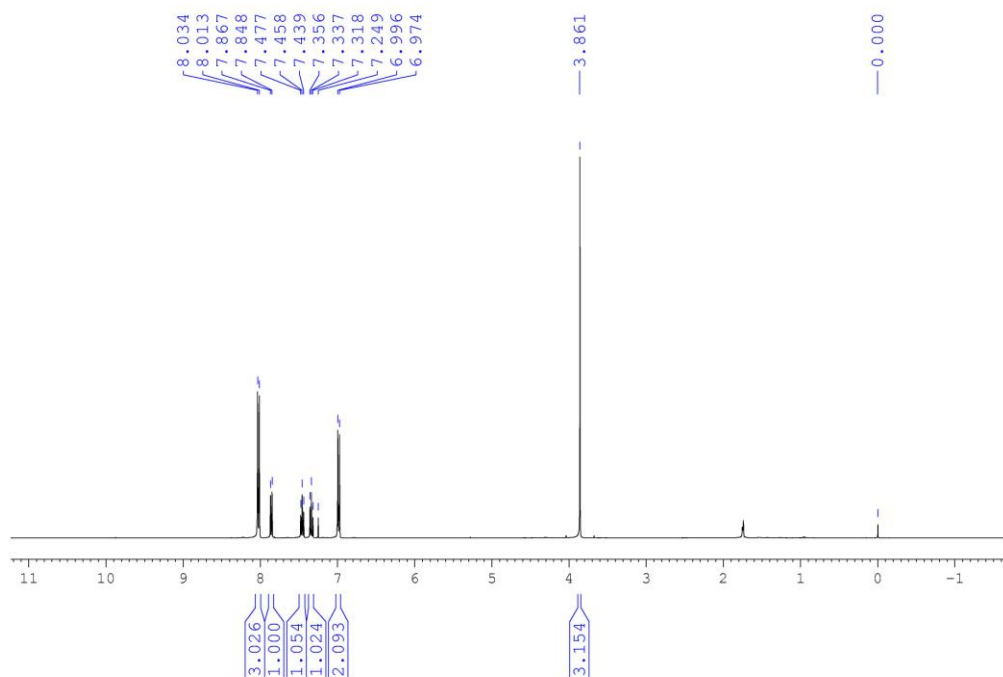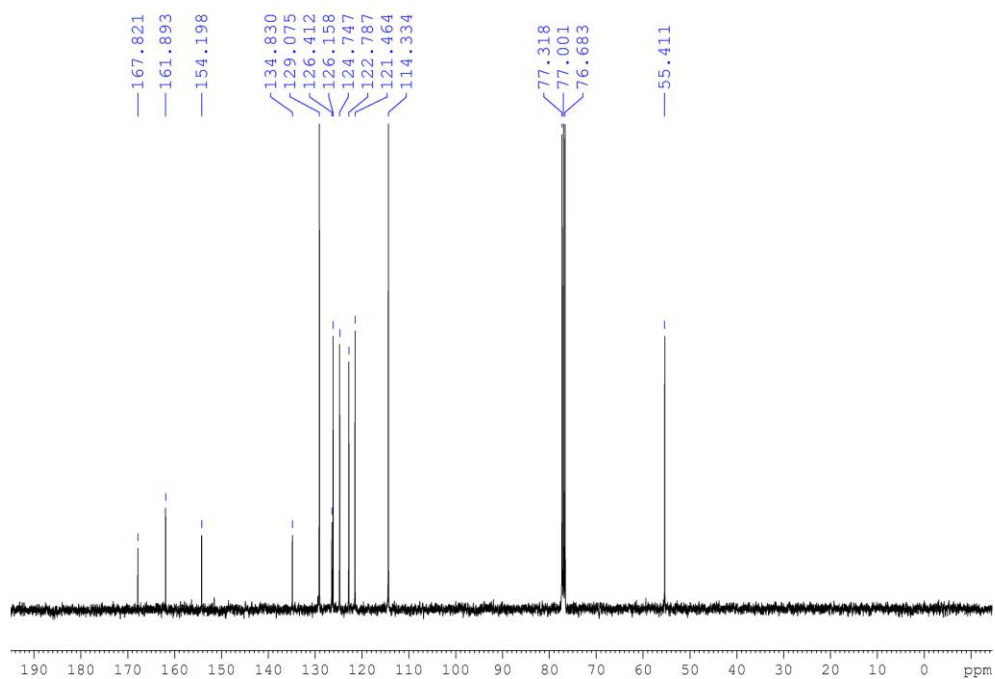



**3ak**

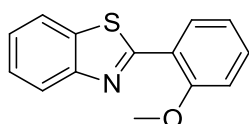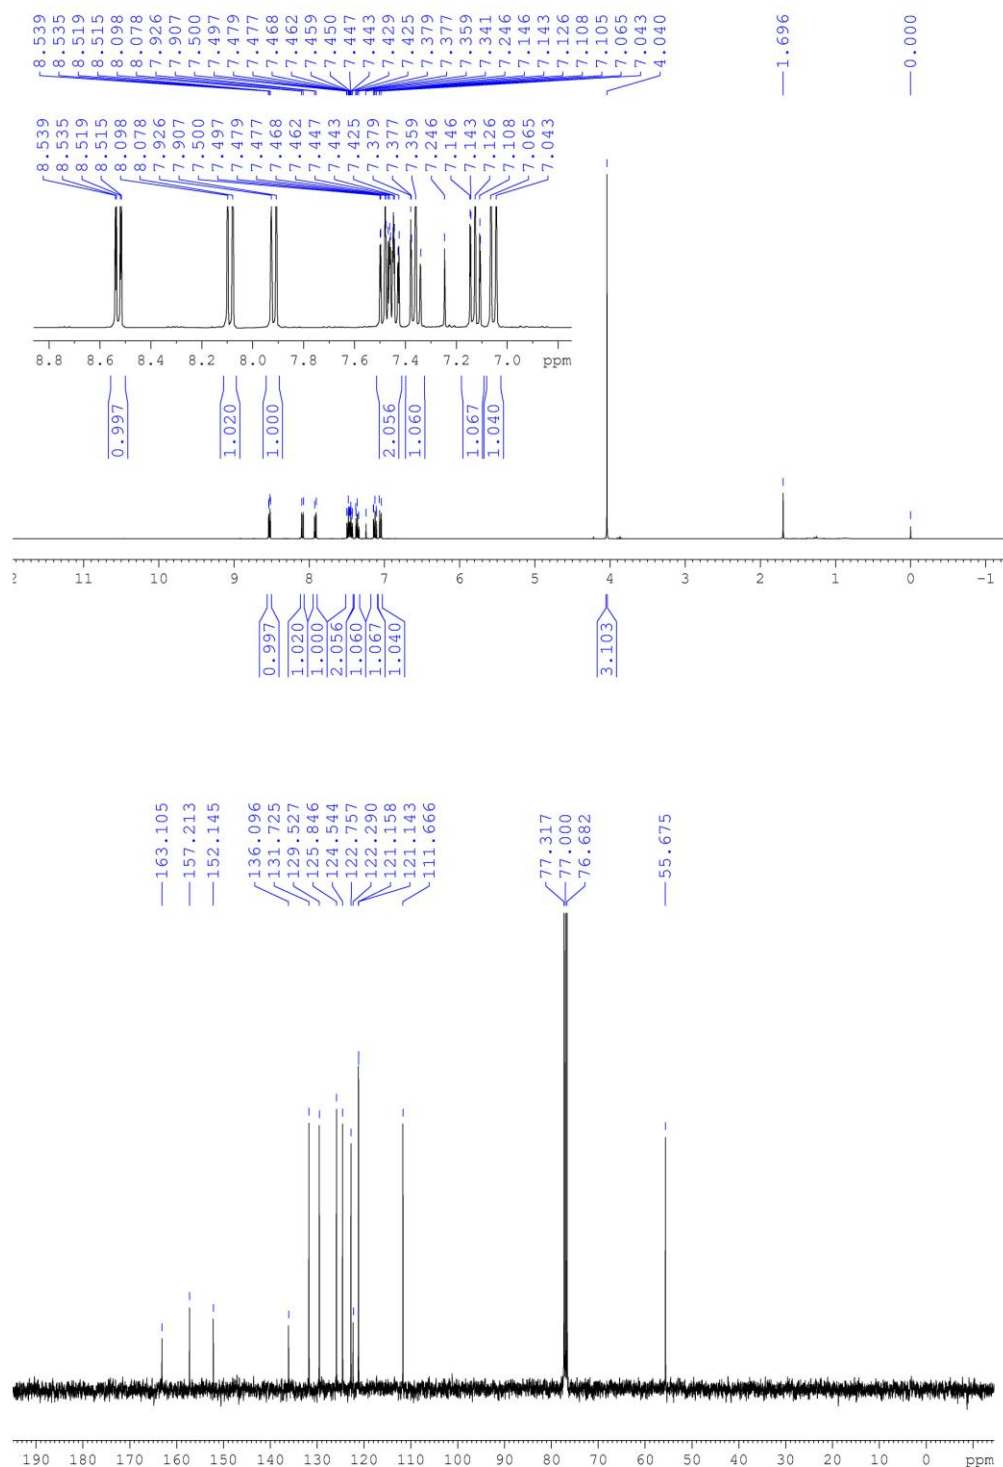

**3al**

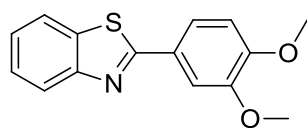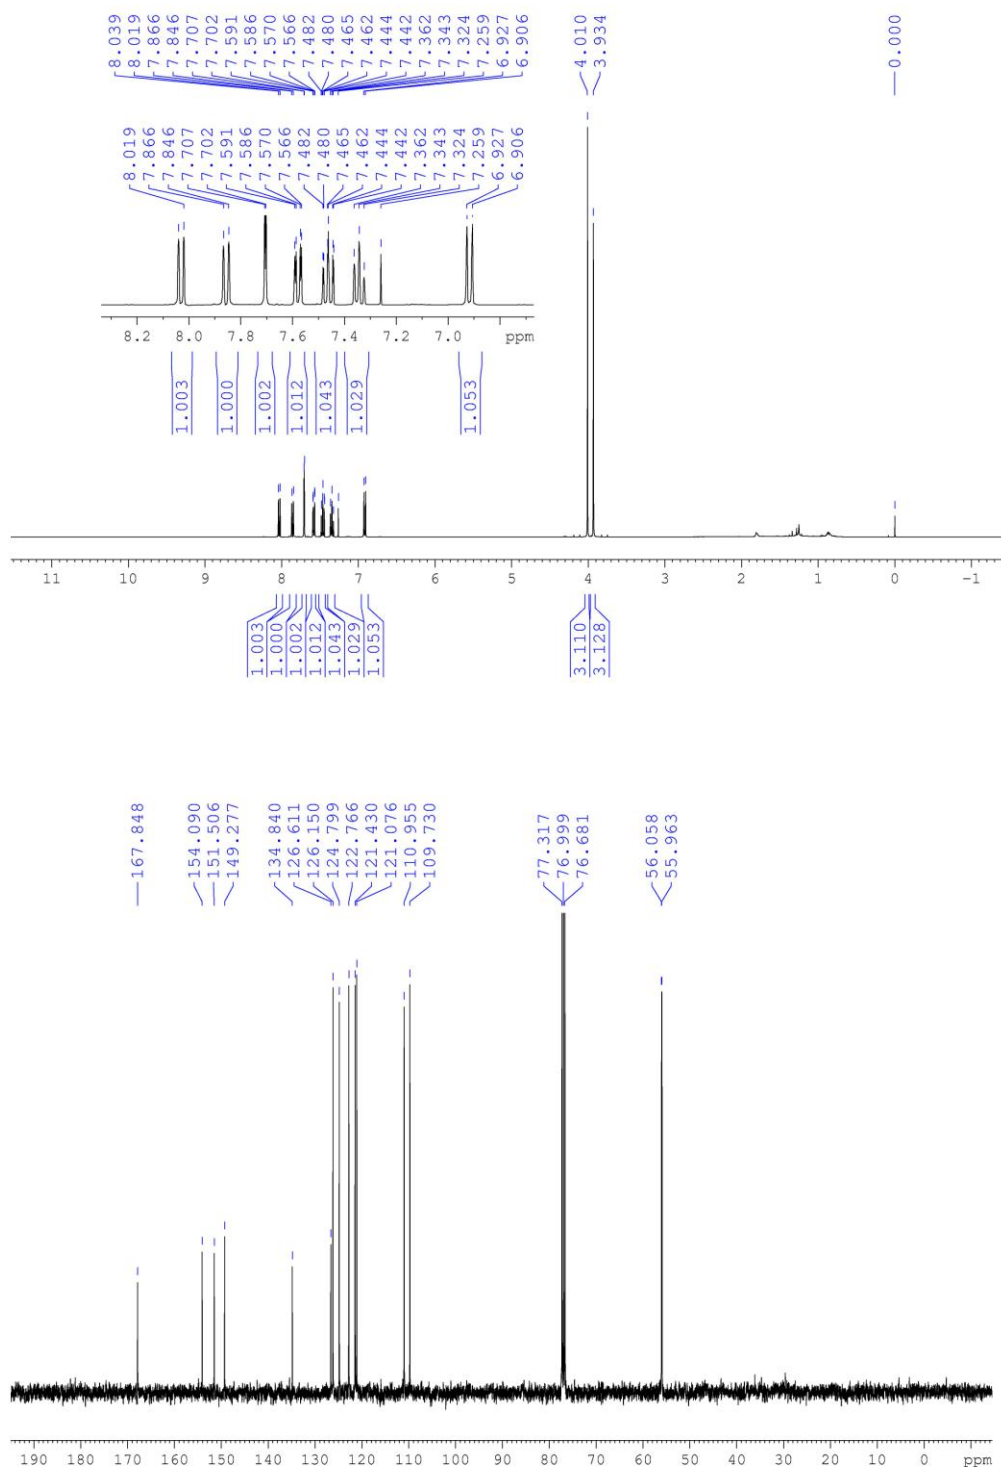

**3am**

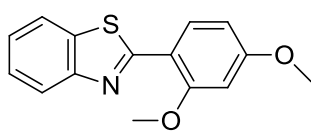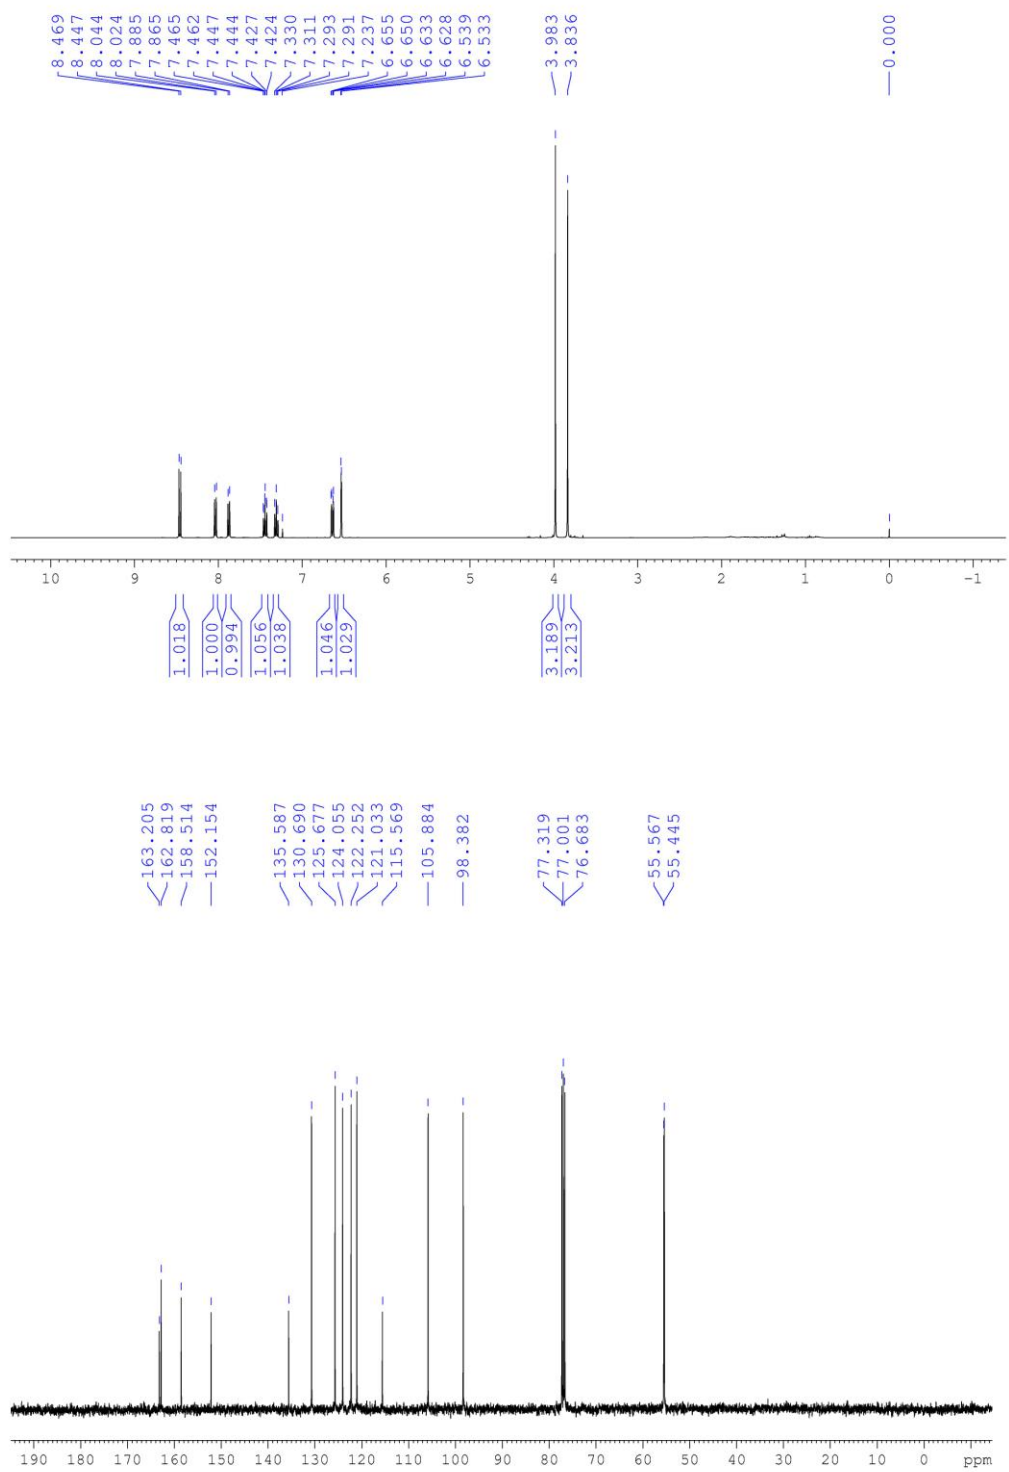

**3an**

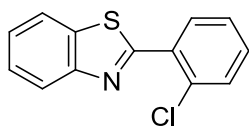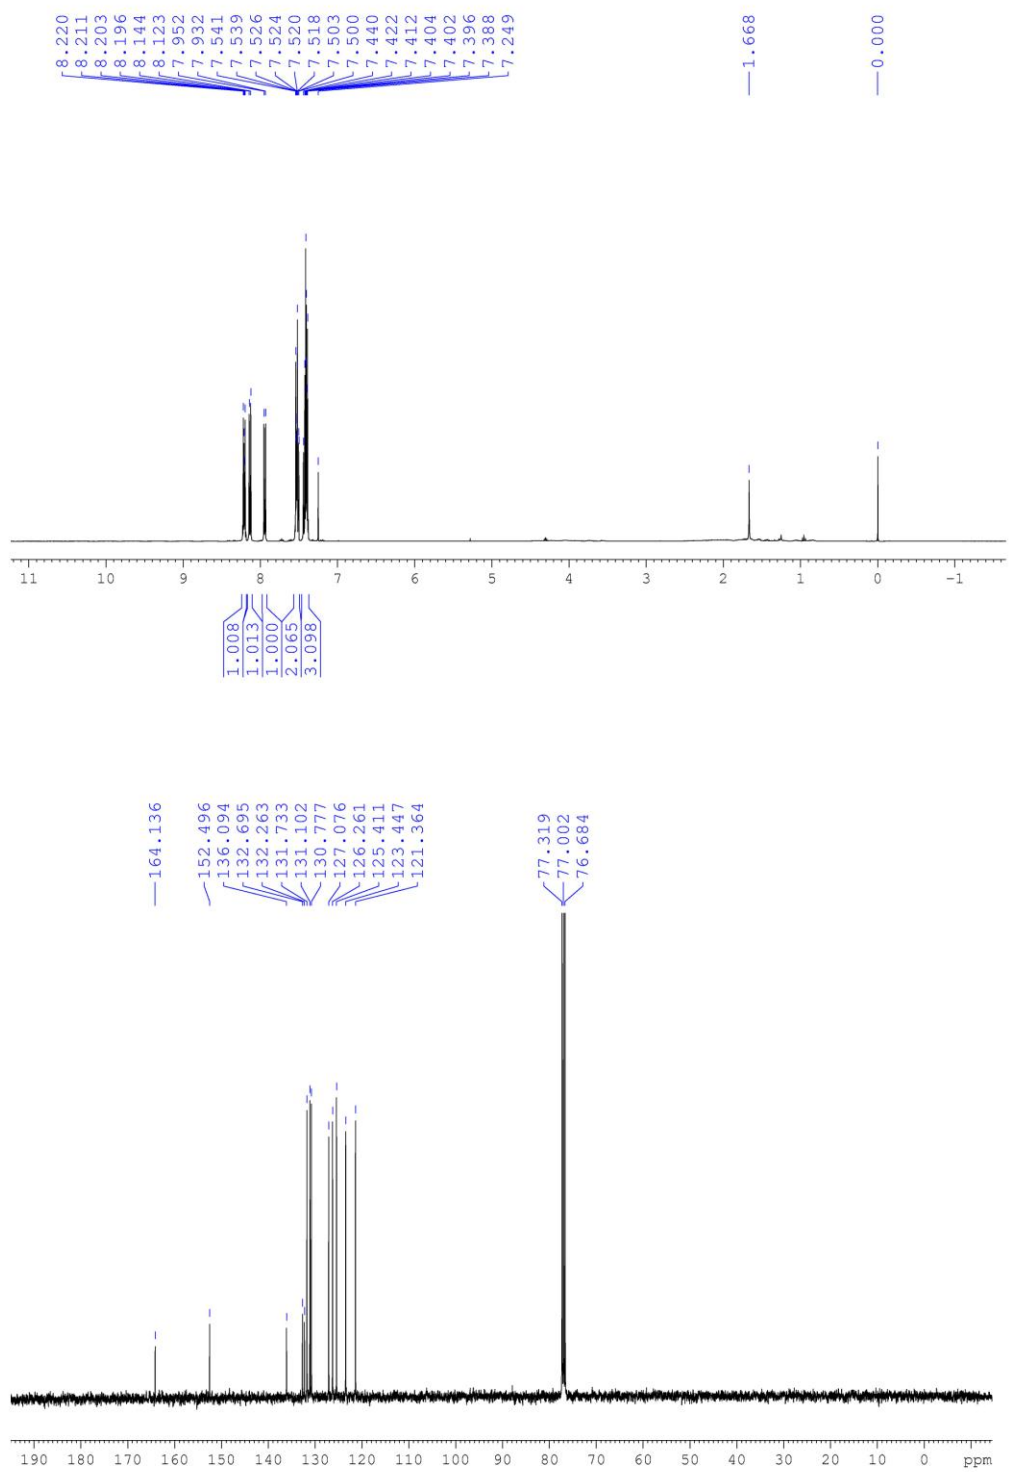

**3ao**

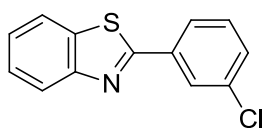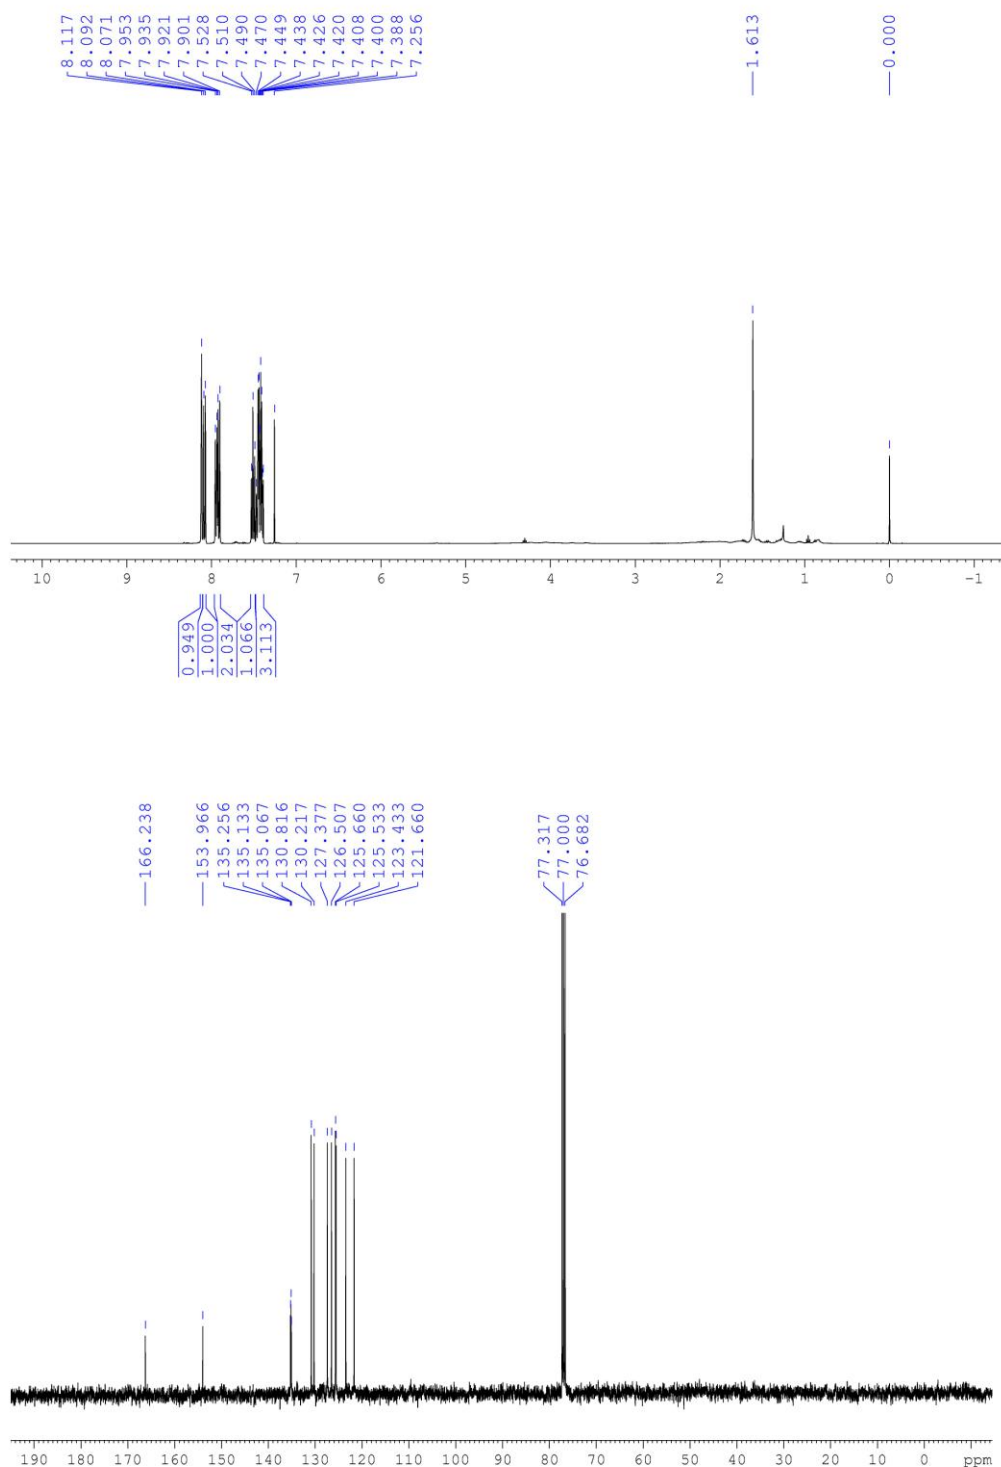

**3ap**

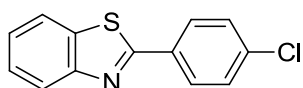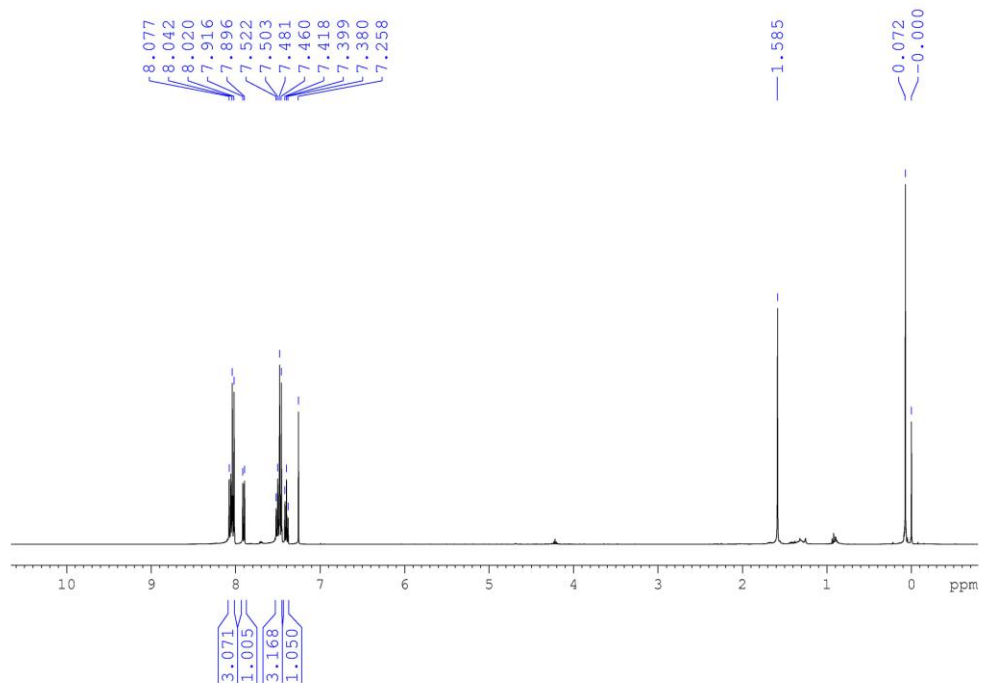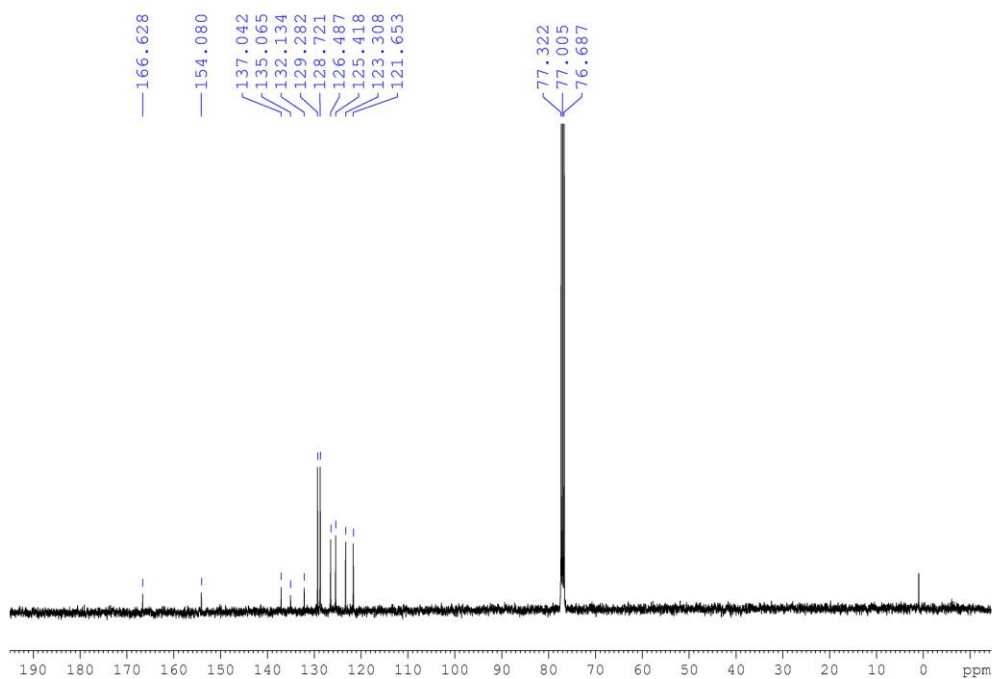

**3aq**

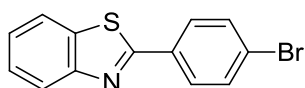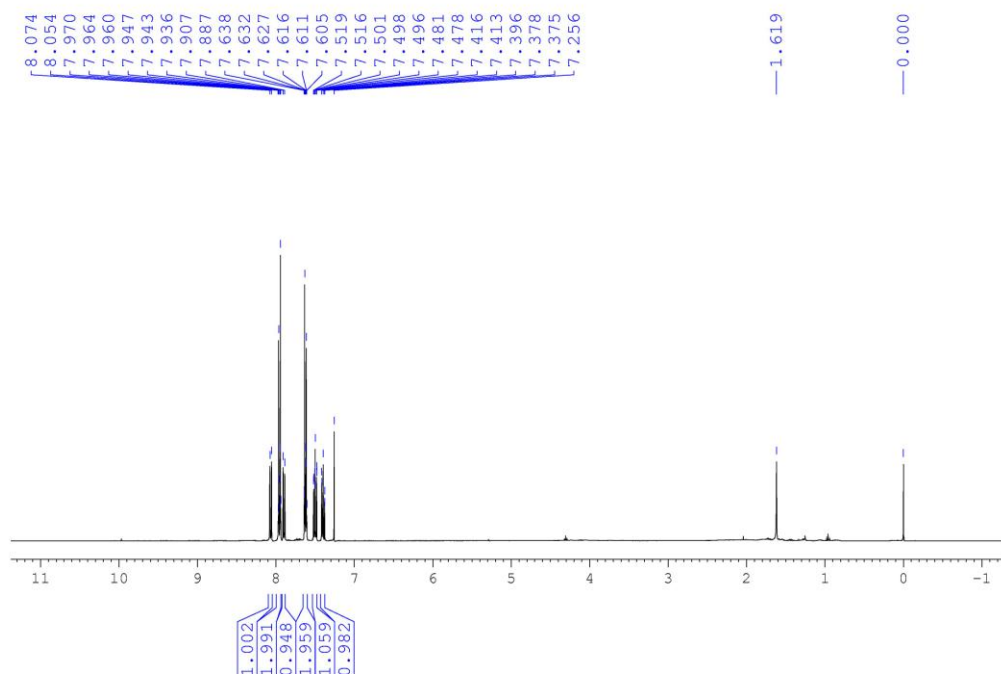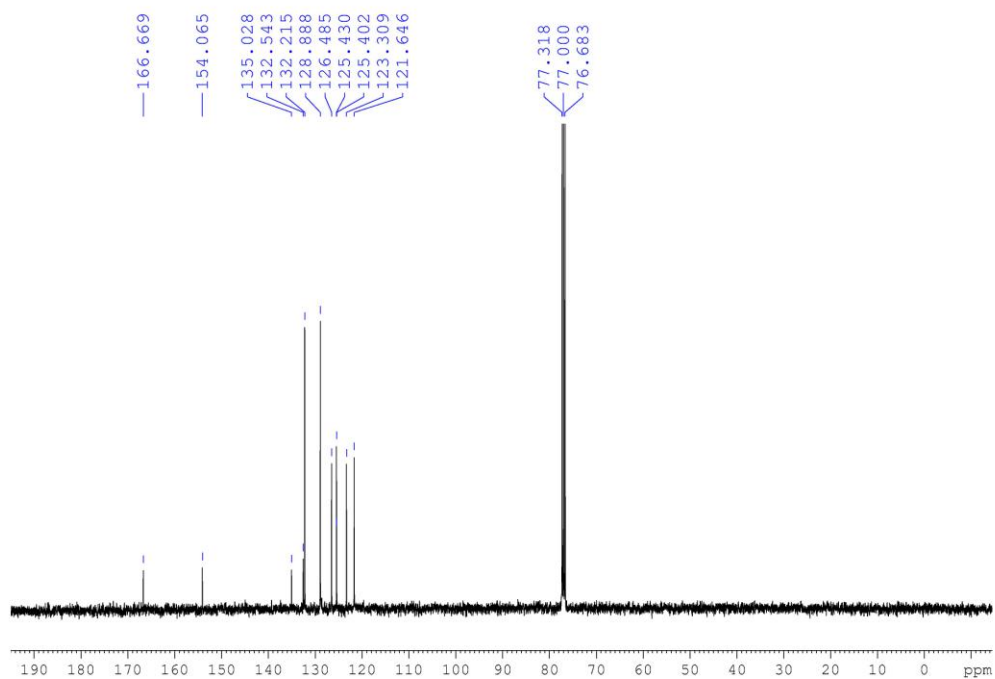

**3ar**

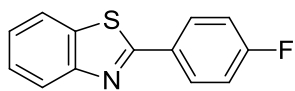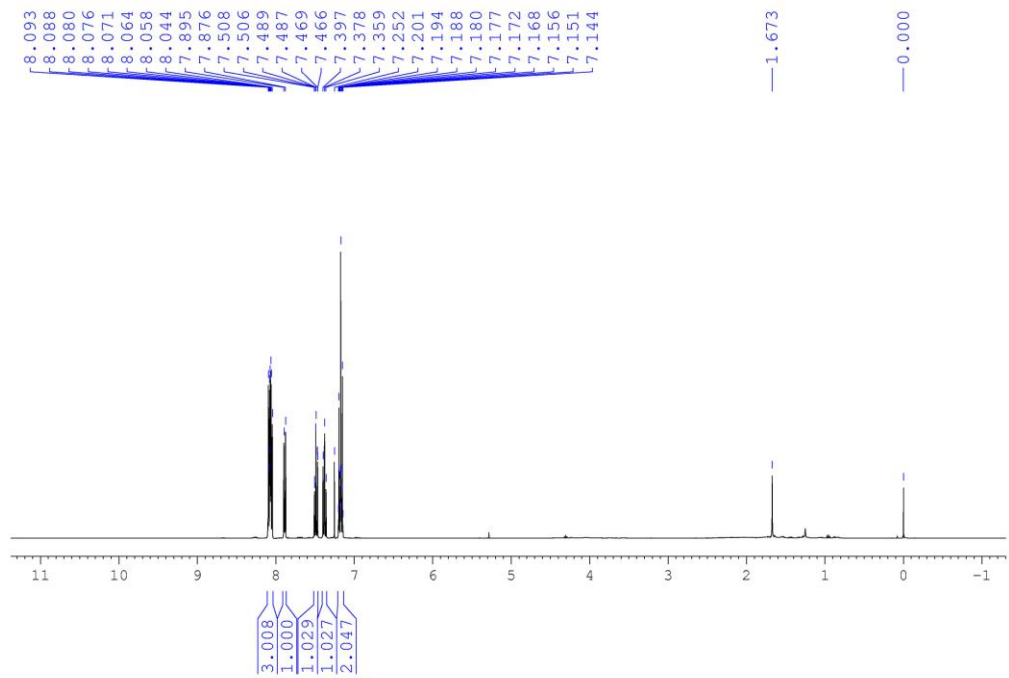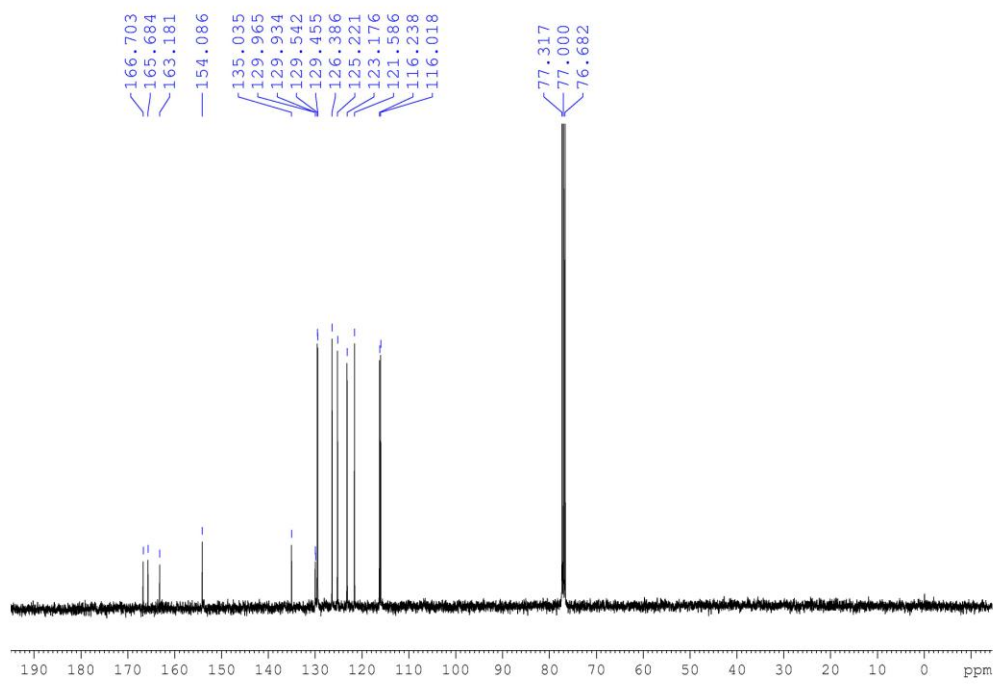



**3as**

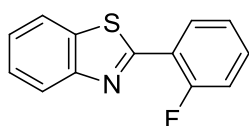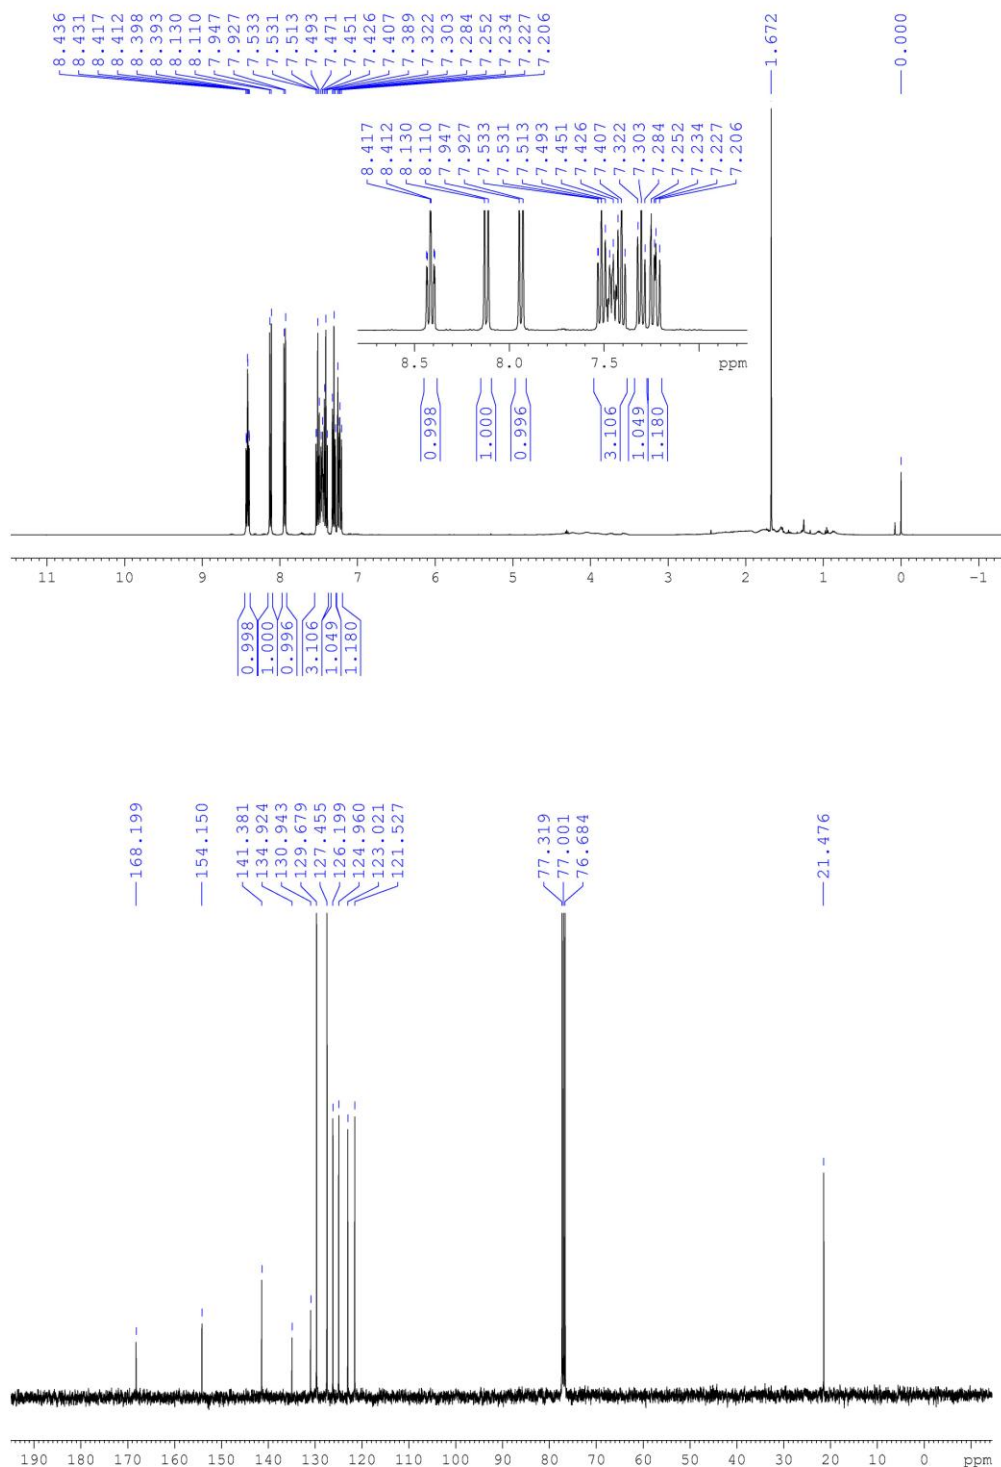

**3at**

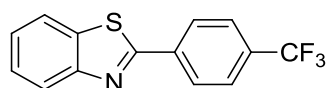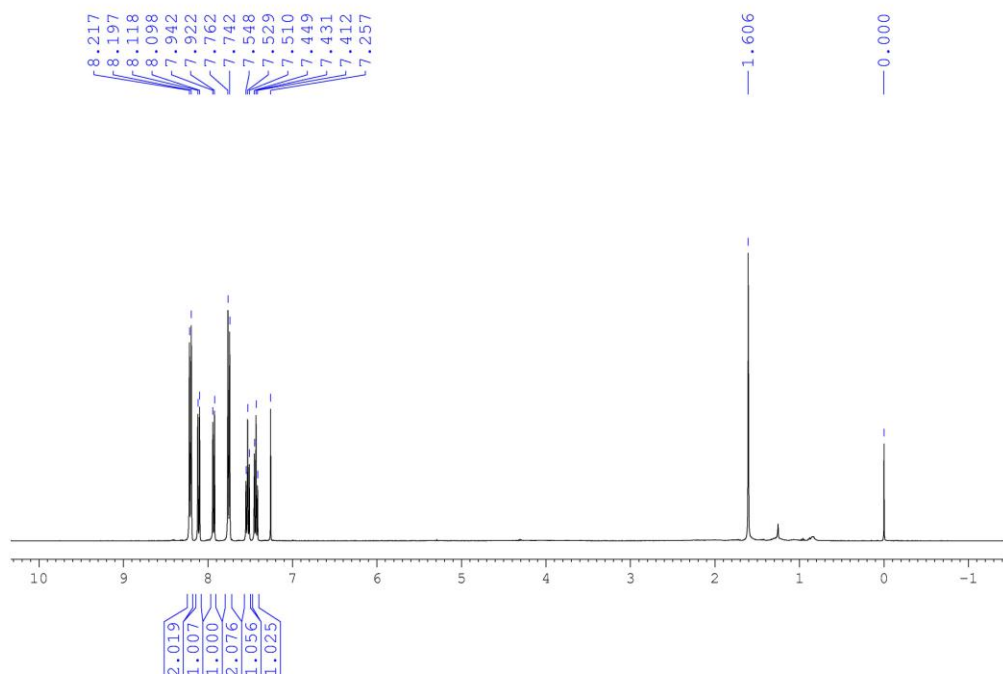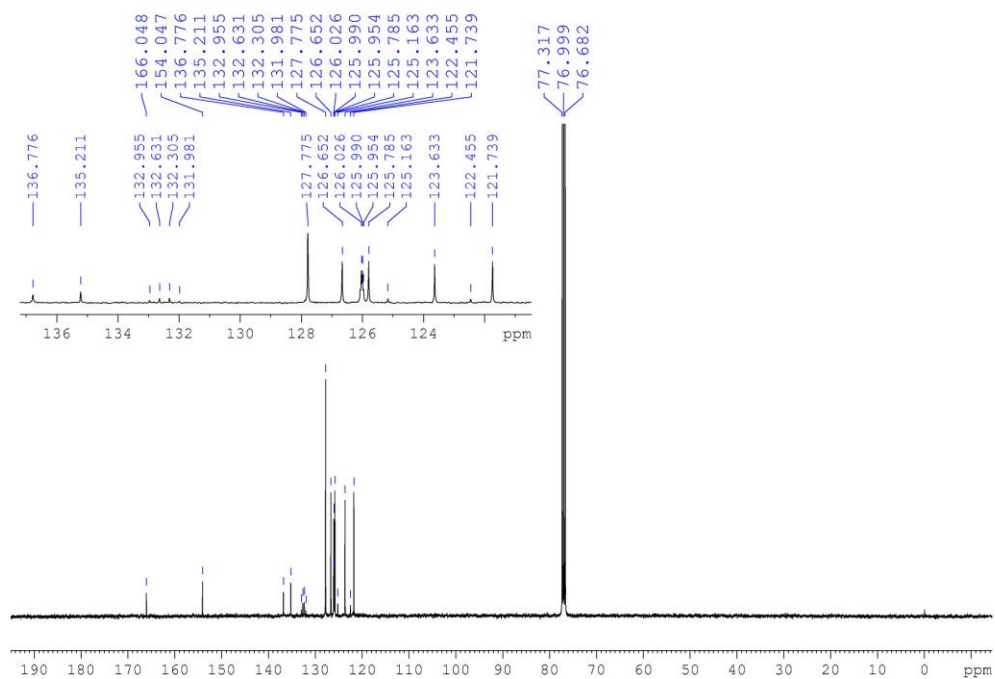

**3au**

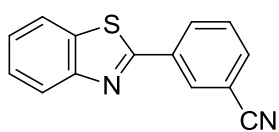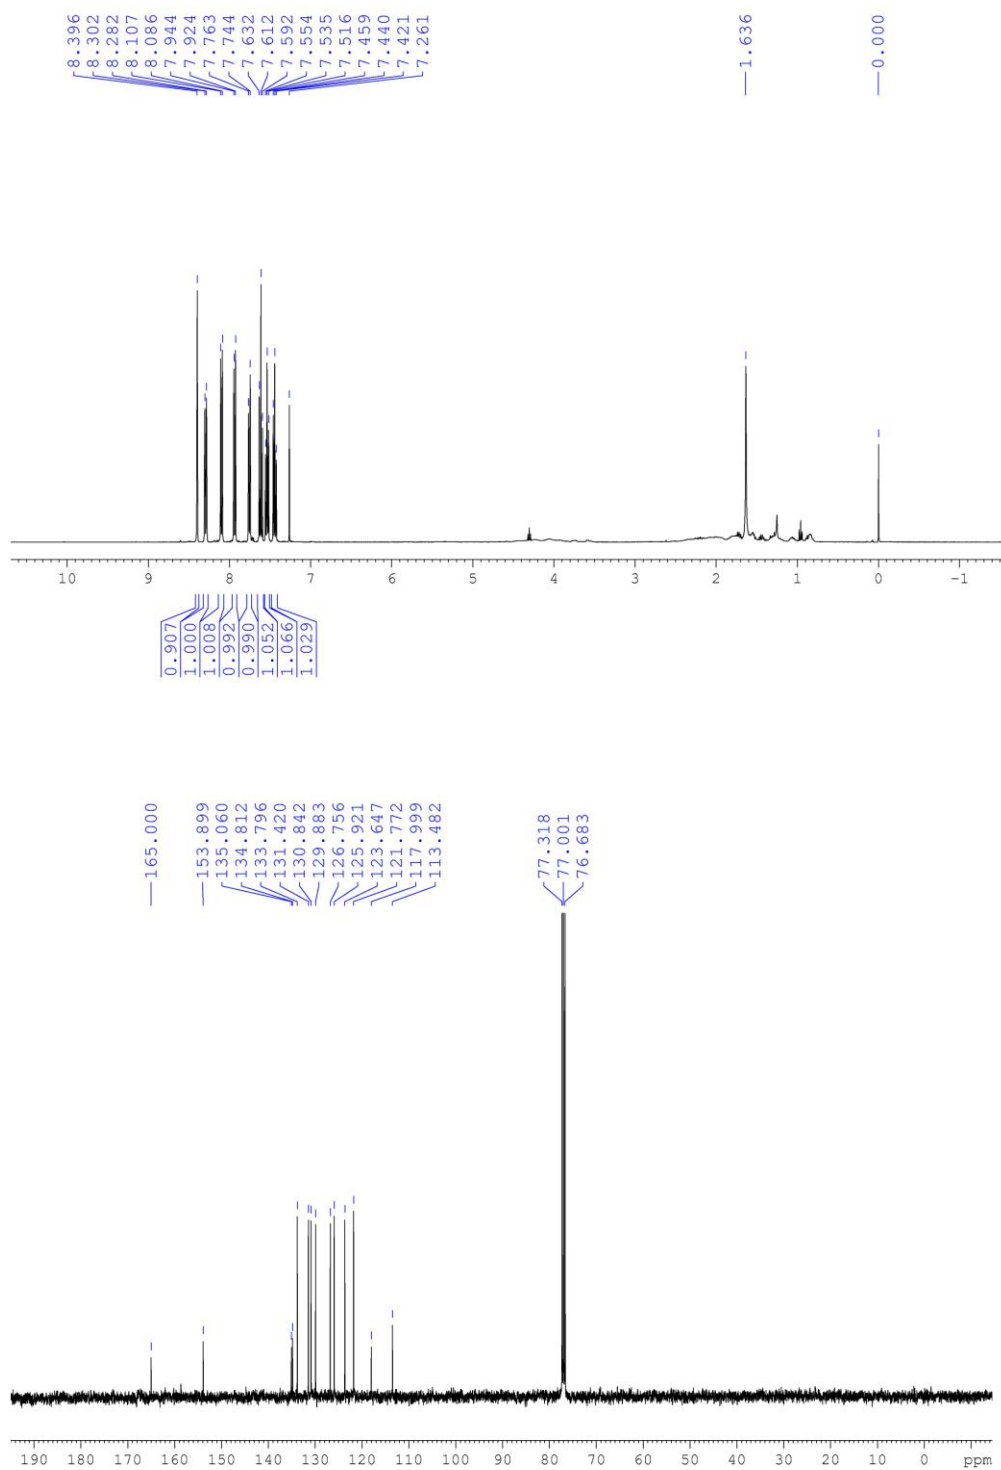

**3av**

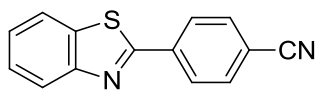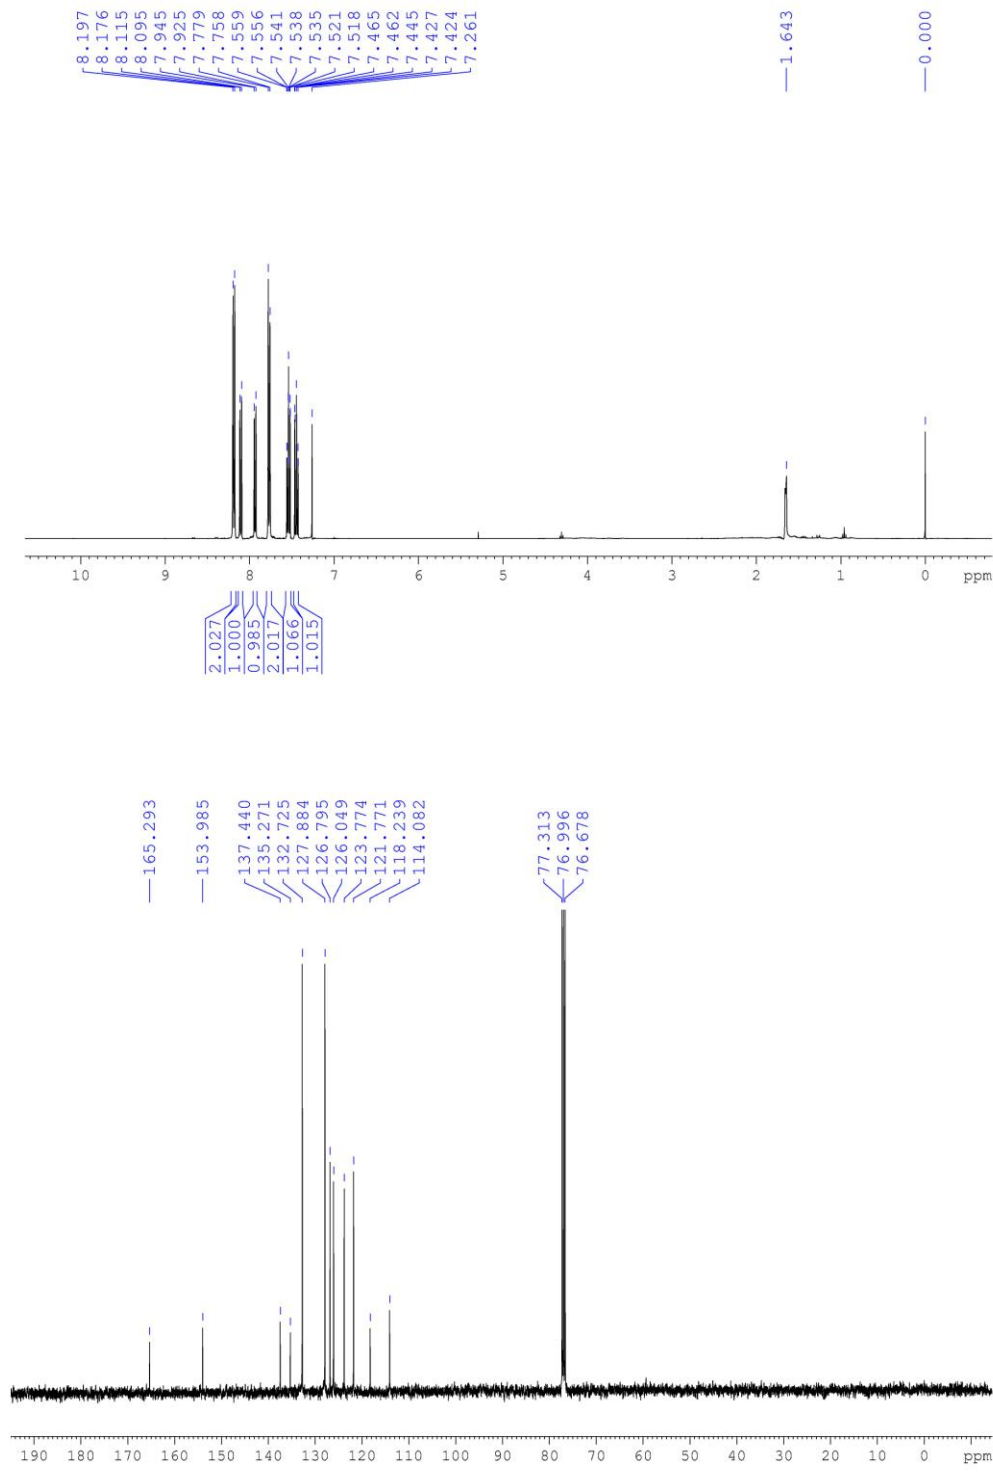

**3aw**

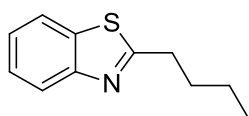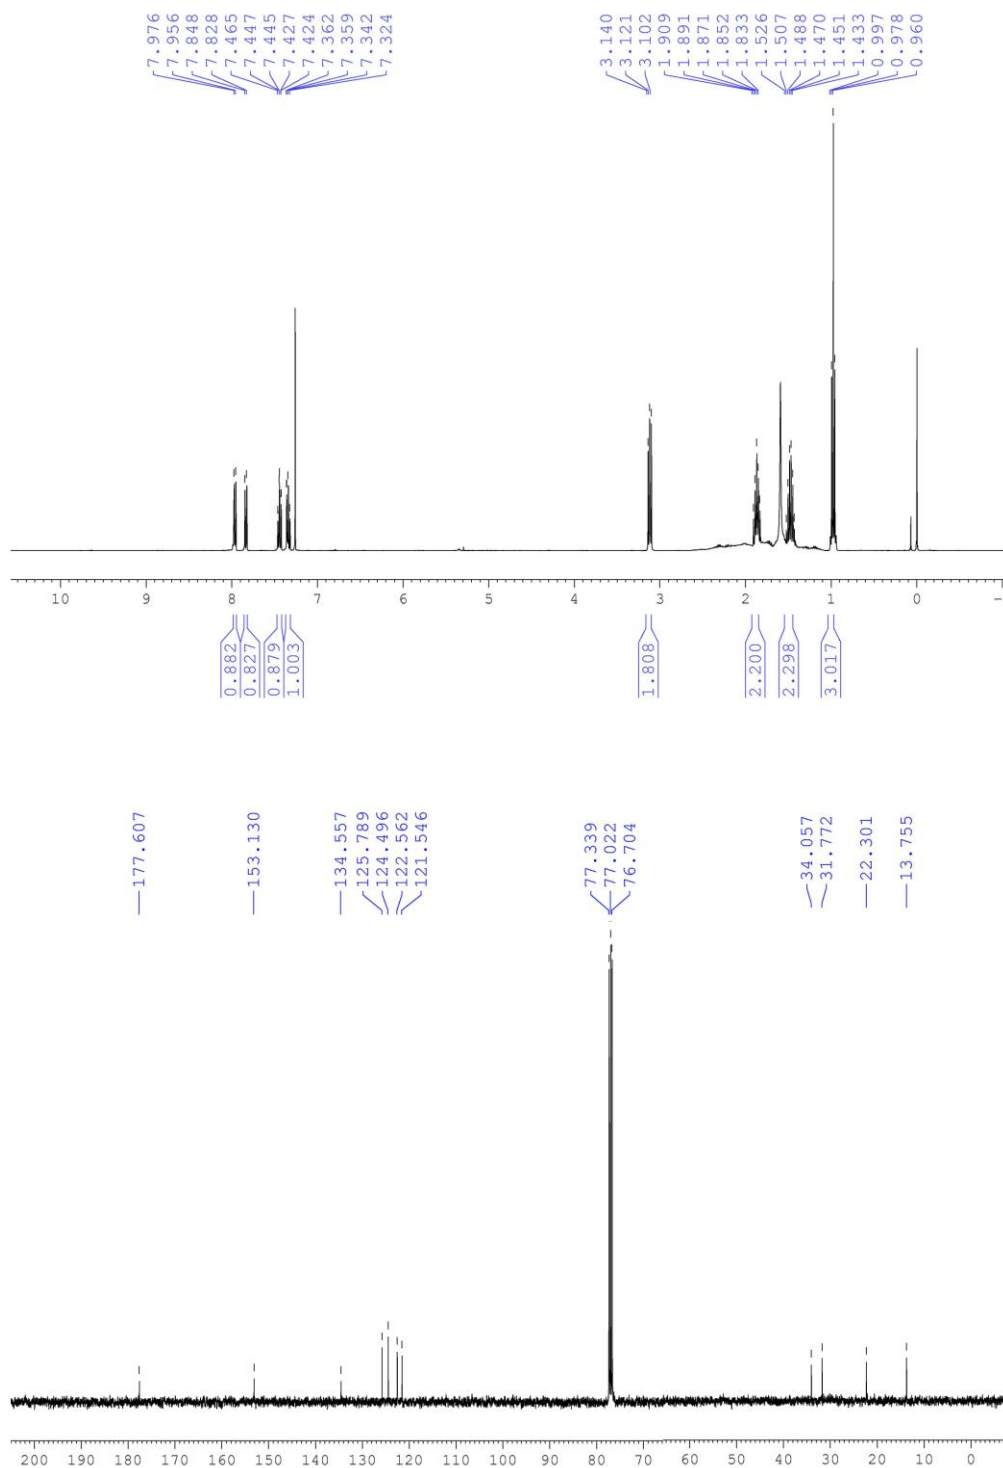

**3ax**

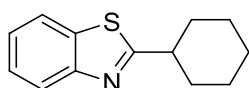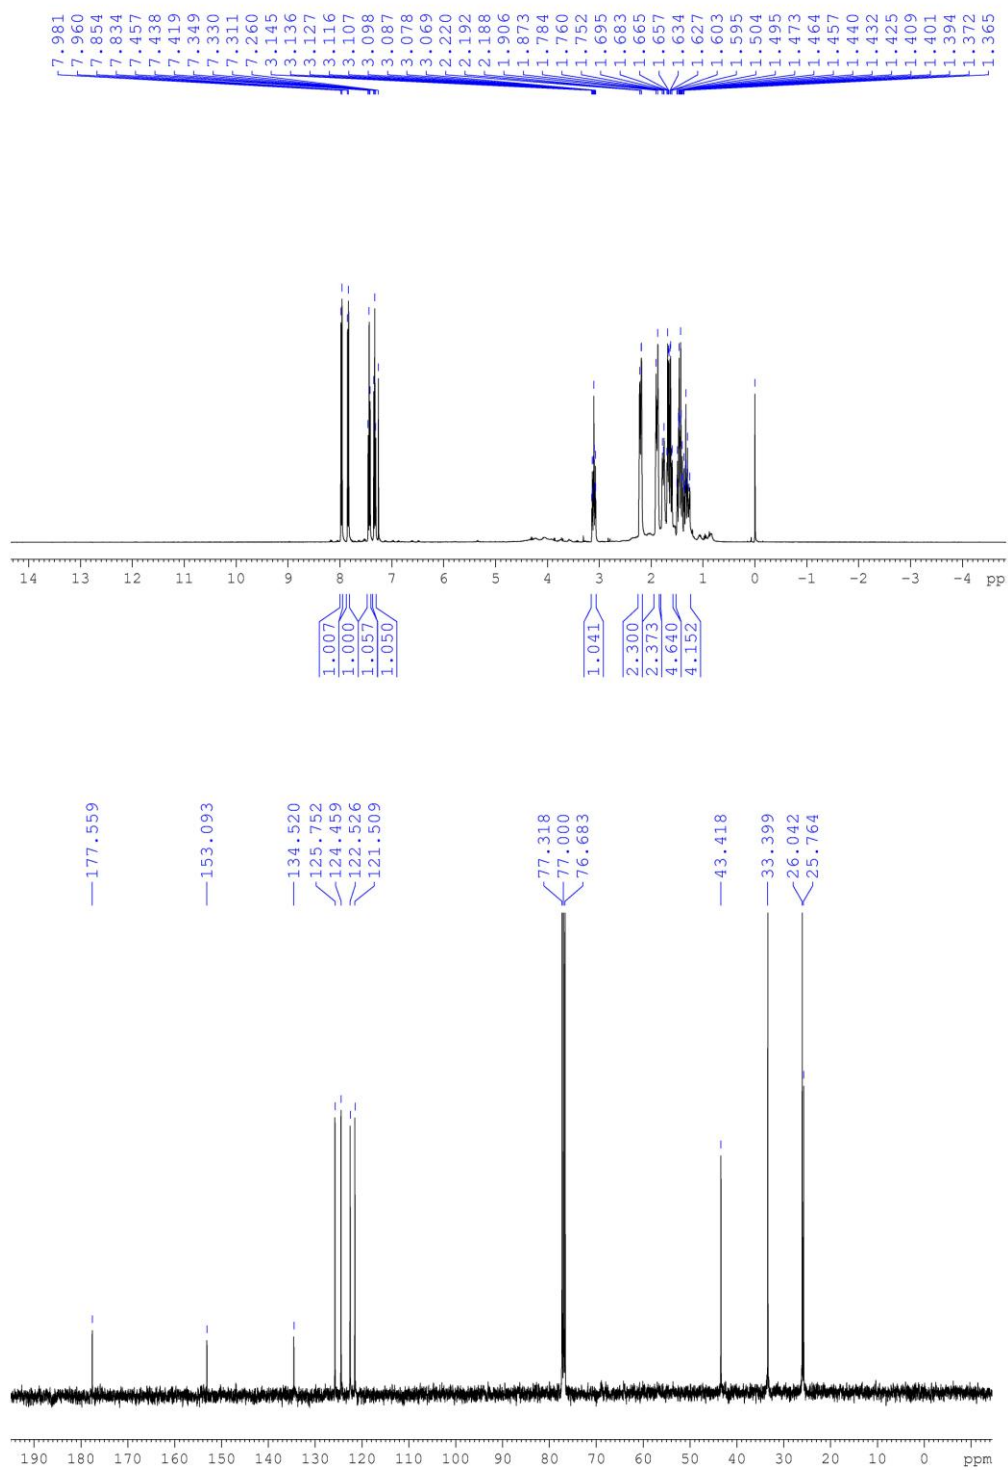

**3ba**

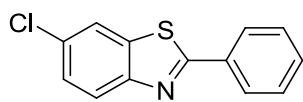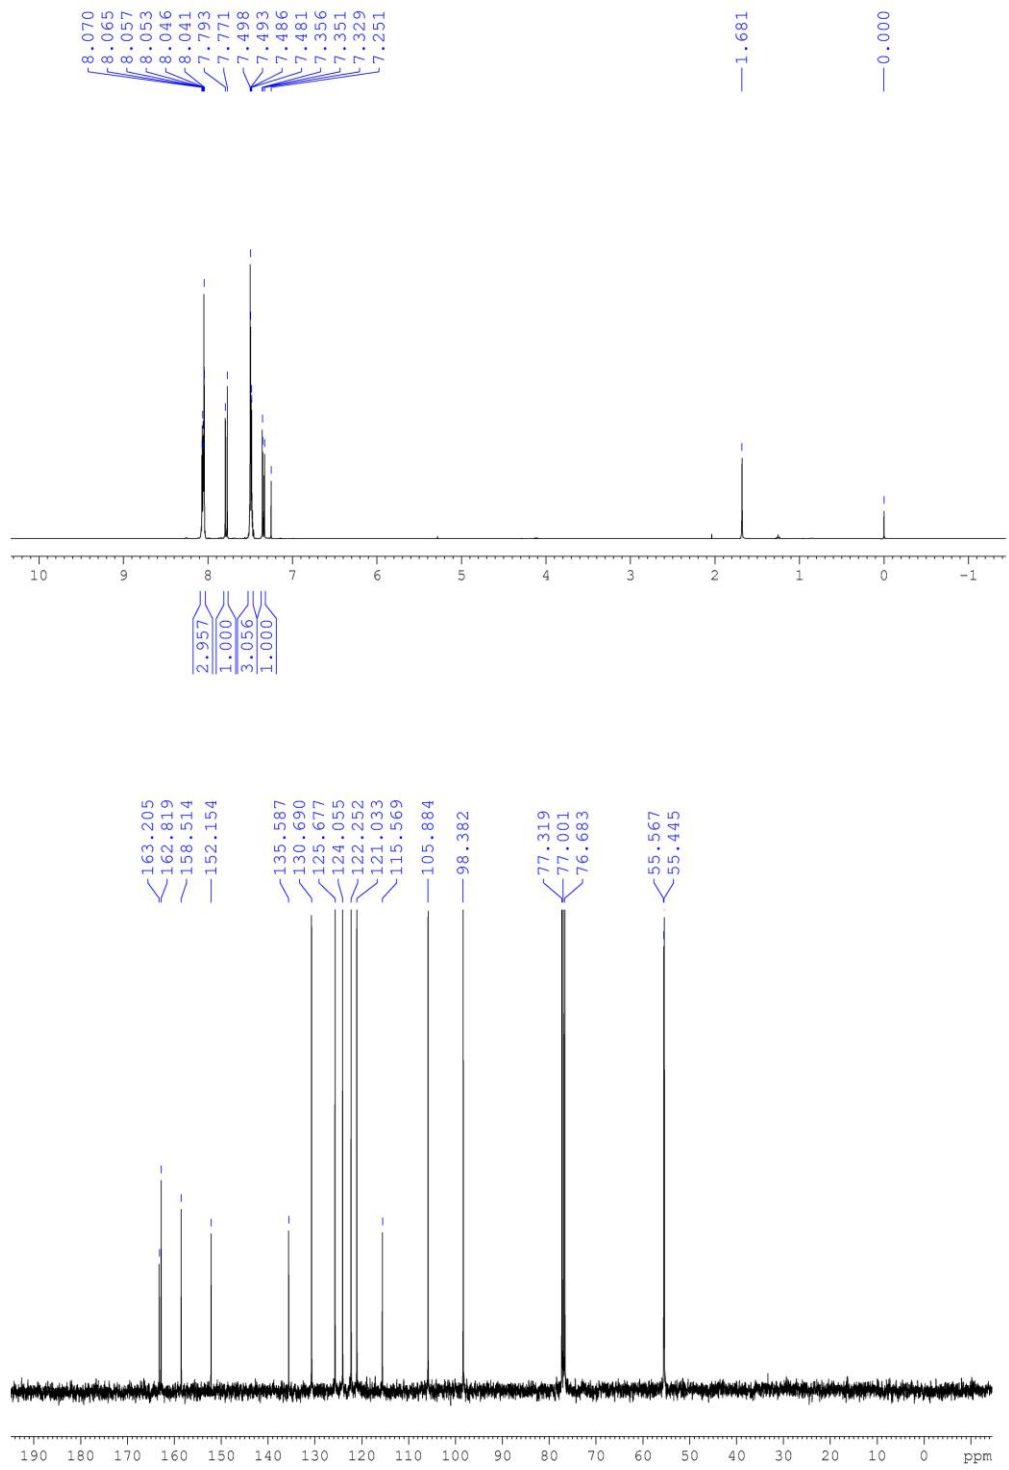

**3bp**

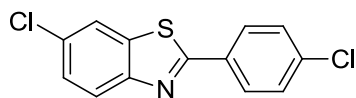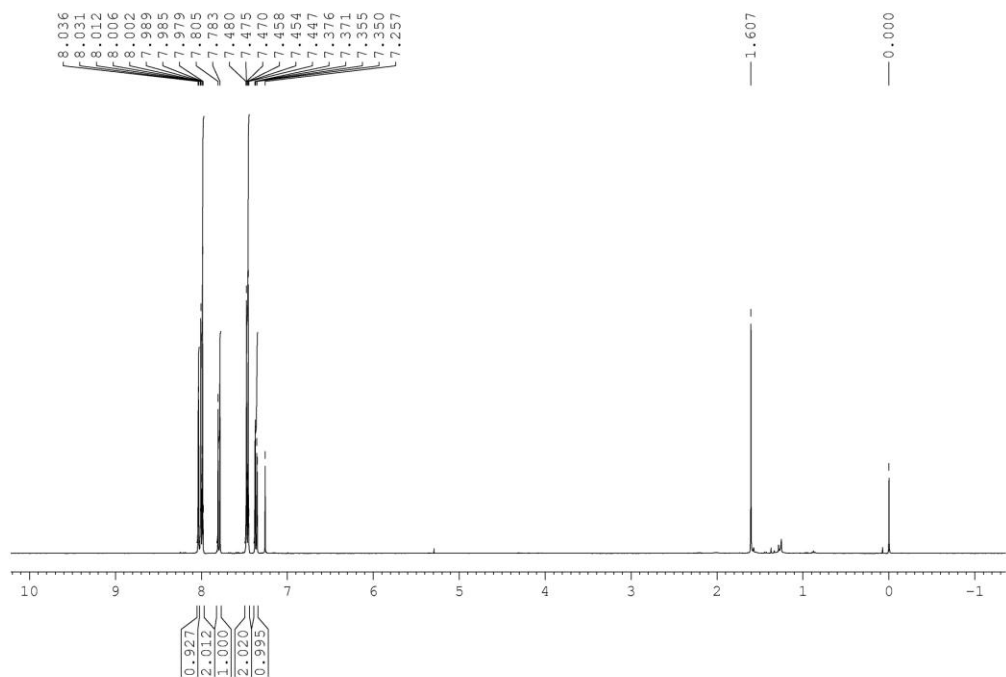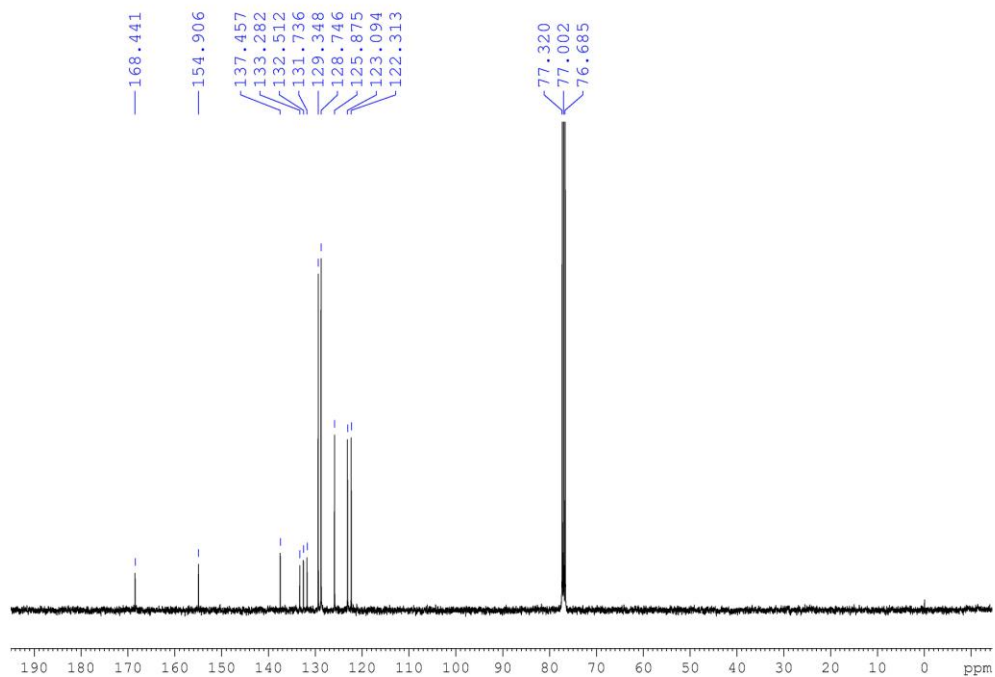



**3ca**

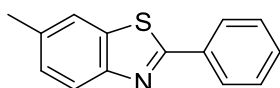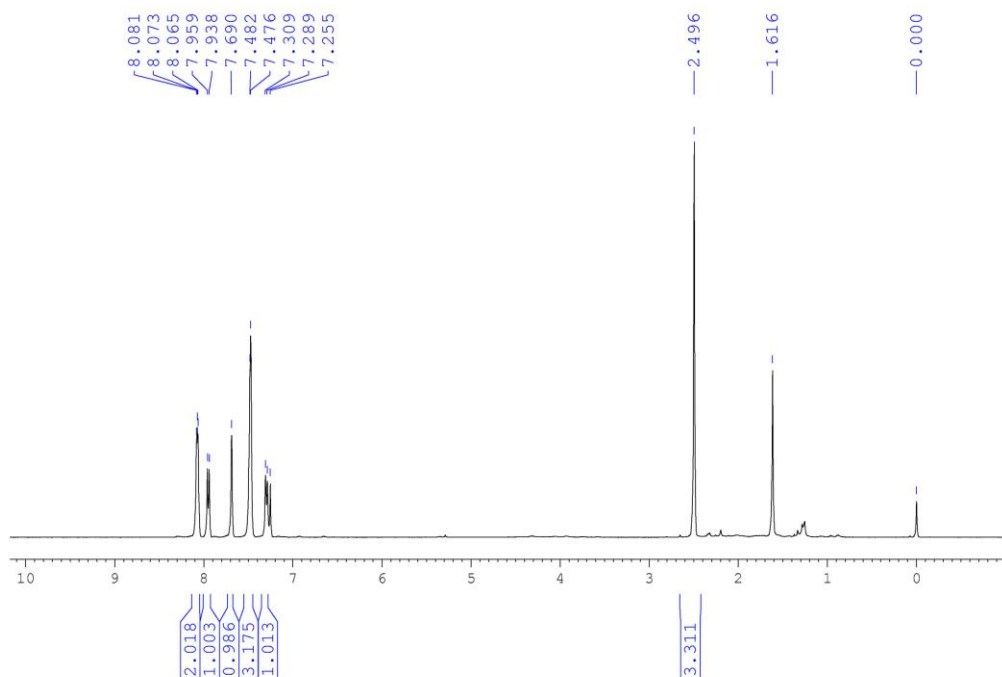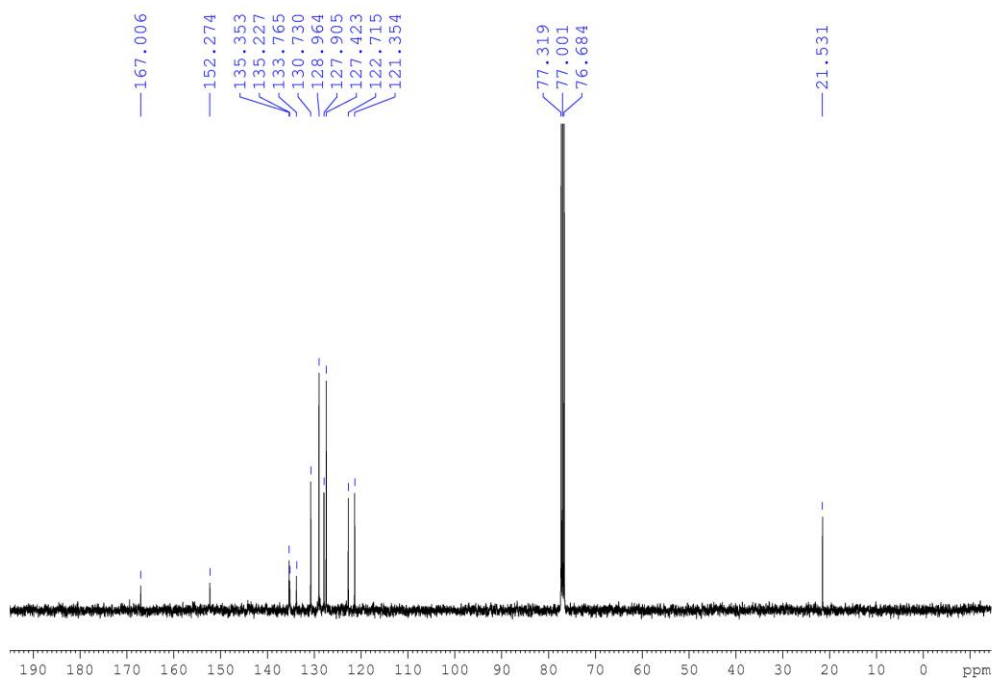

**3da**

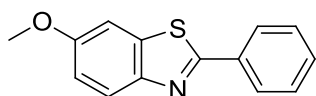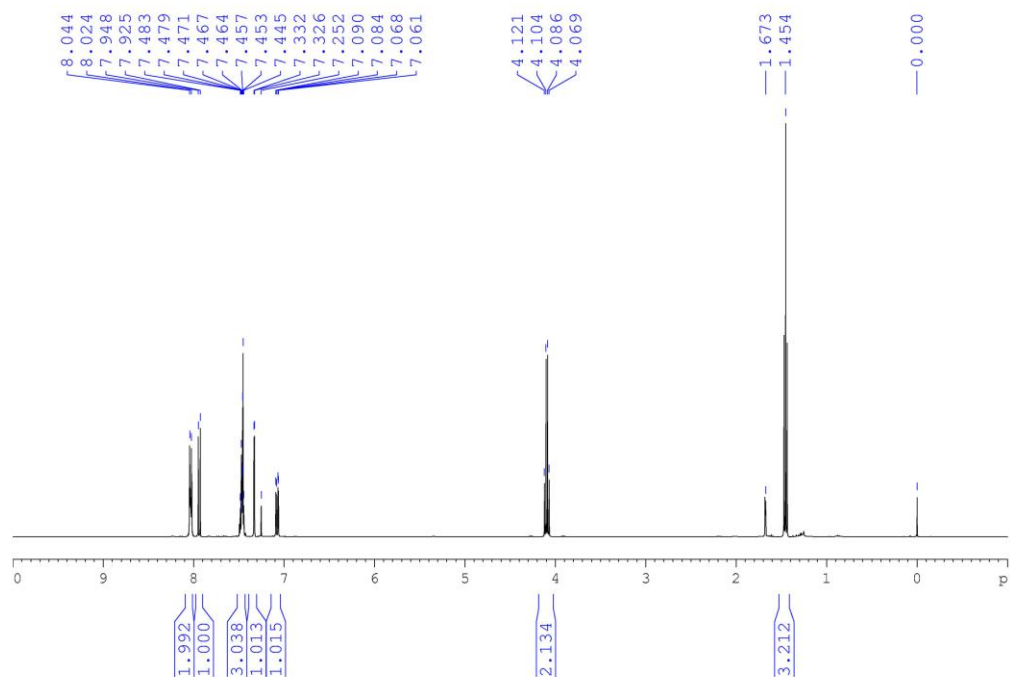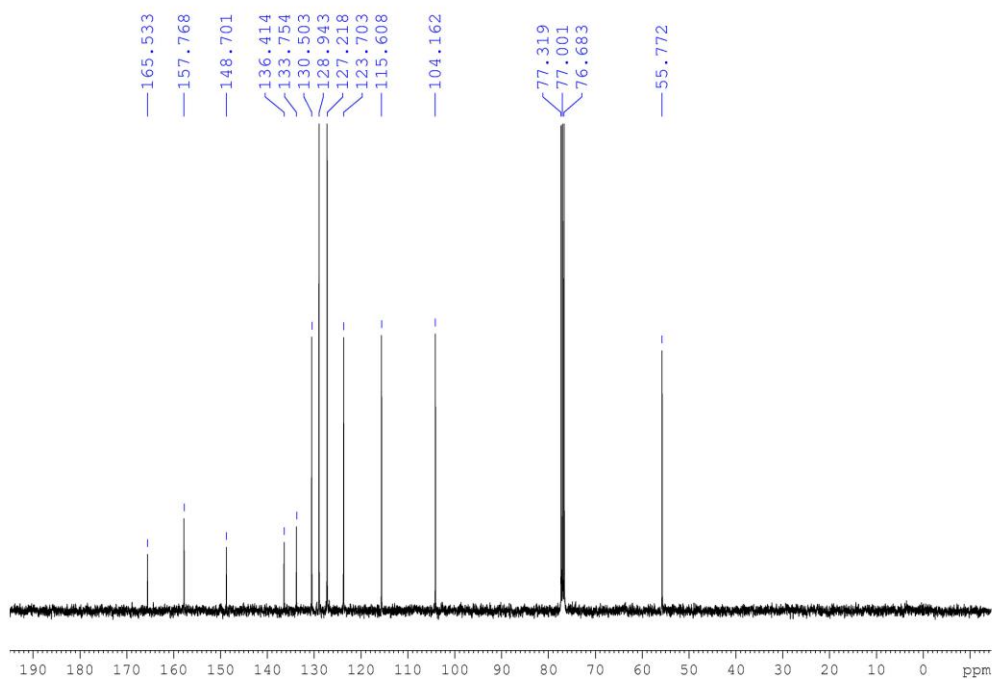

**3ea**

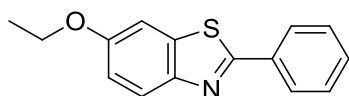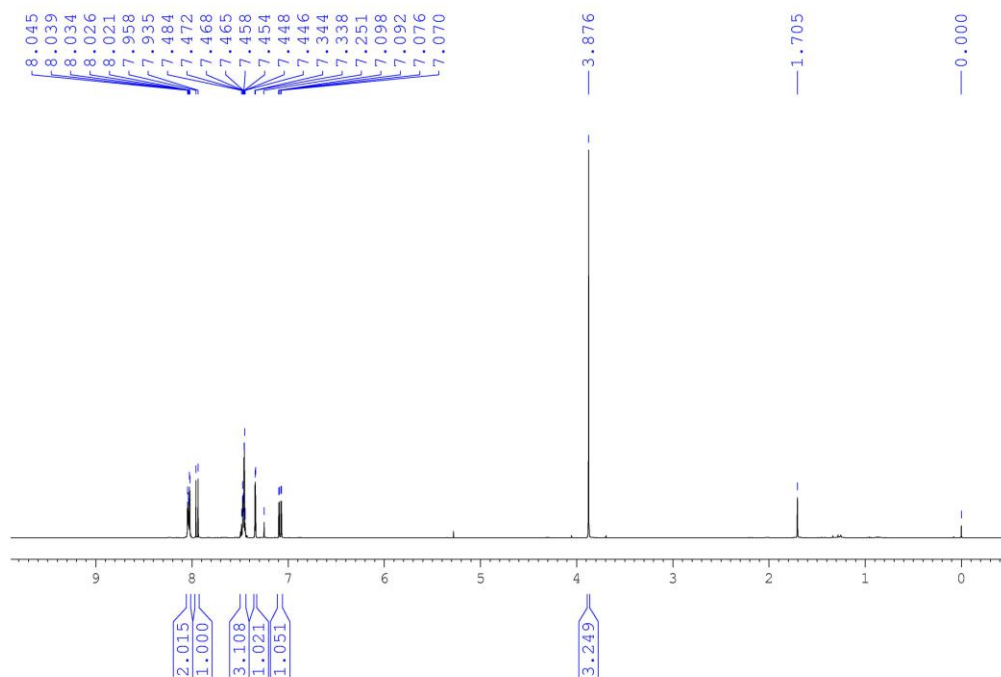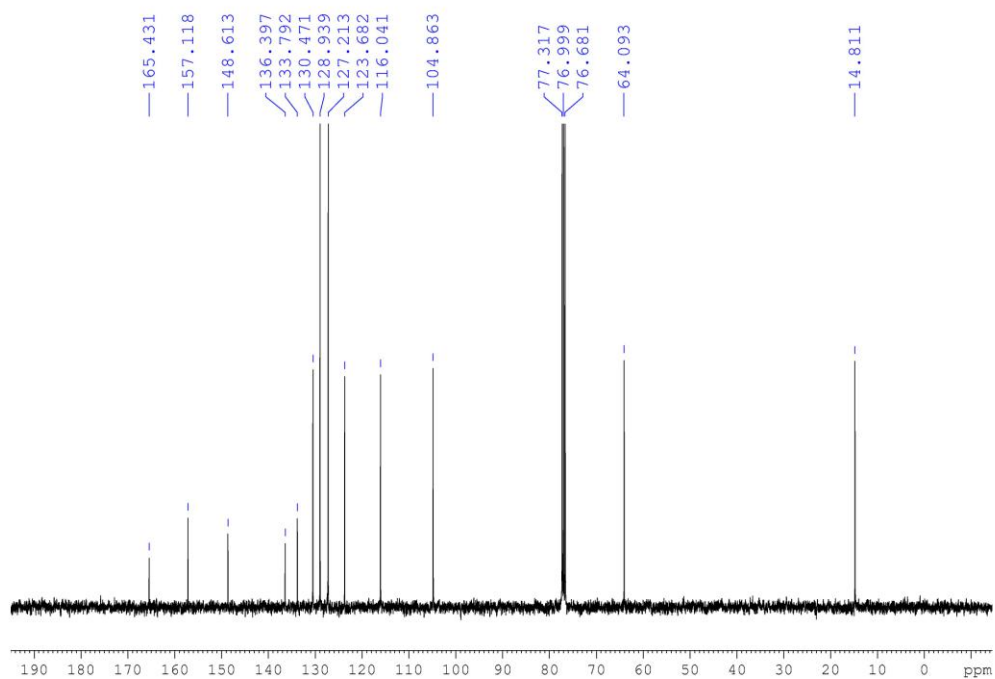

**3fa**

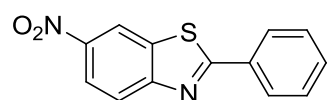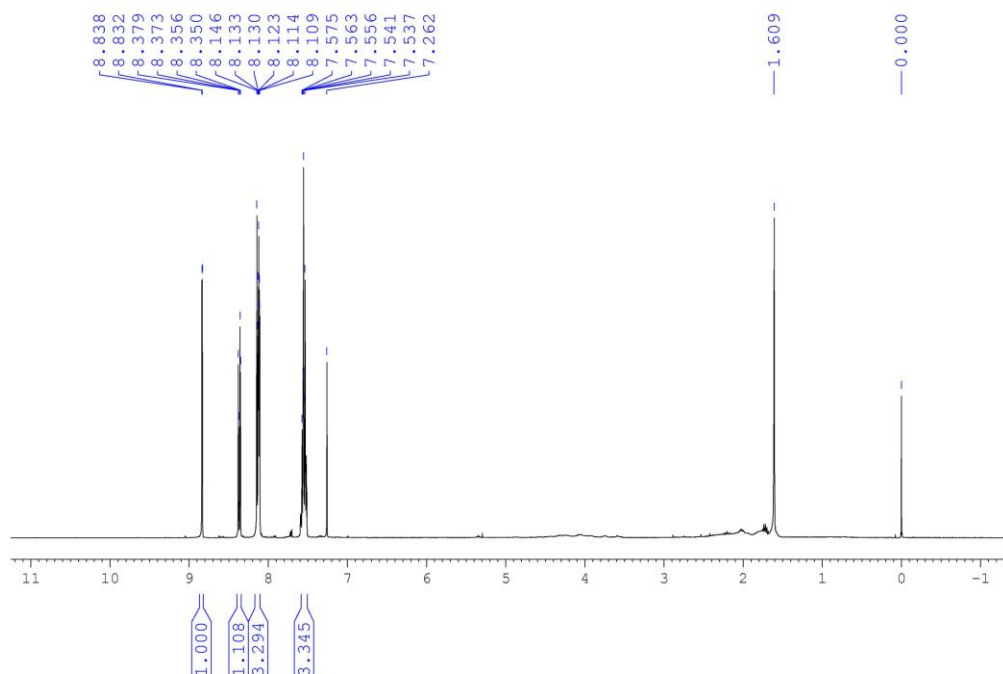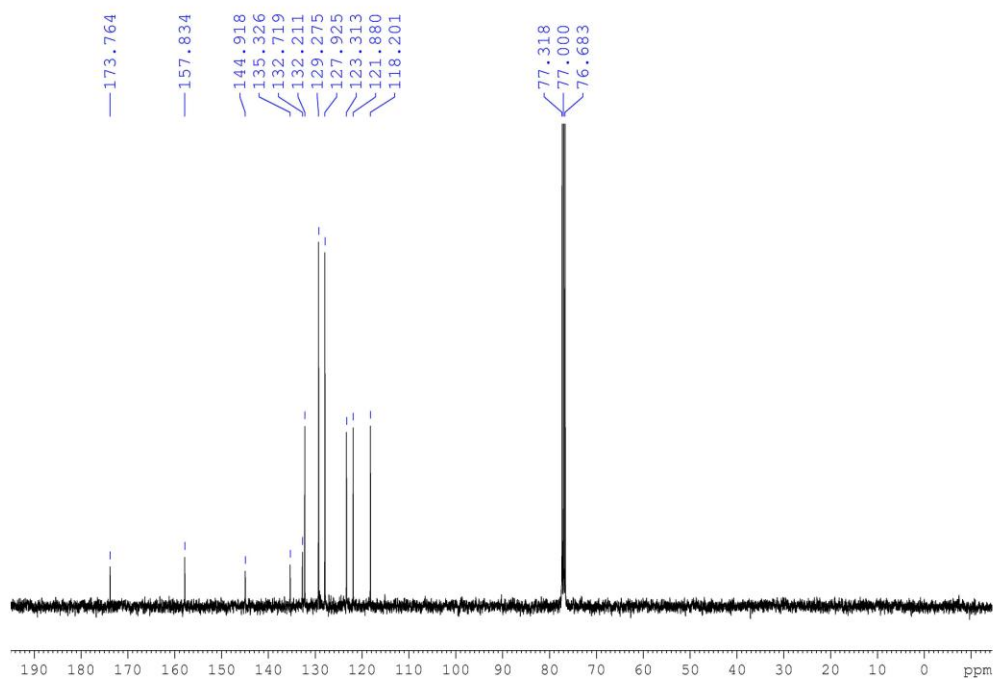

Supplement: c3ob42318b.pdf [file c3ob42318b.pdf]
